# Supplementary material for: The Prevalence and Characteristics of E-Cigarette Users in the U.S
Source: Int J Environ Res Public Health. 2017 Oct 11;14(10):1200. doi: 10.3390/ijerph14101200 (PMC5664701; doi:10.3390/ijerph14101200)
Supplement: Supplementary file 1 [file ijerph-14-01200-s001.pdf]

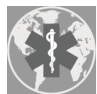

## Supplementary Materials

### List of Tables: (supplementary)

Supplementary Table S1a. Ever, Current (at Least Once in the Last 30 Days), 5 or More, 10 or More, 20 or More of the Last 30 Days Measures of E-cigarette Use, Smokers 12 Months Ago, TUS-CPS, 2014/5

Supplementary Table S1b. Ever, Current (at Least Once in the Last 30 Days), 5 or More, 10 or More, 20 or More of the Last 30 Days Measures of E-cigarette Use, Former Smokers Who Quit More Than One Year and Less Than or Equal to Three Years, TUS-CPS, 2014/5

Supplementary Table S1c. Ever, Current (at Least Once in the Last 30 Days), 5 or More, 10 or More, 20 or More of the Last 30 Days Measures of E-cigarette Use, Former Smokers Who Quit More Than Three Years, TUS-CPS, 2014/5

Supplementary Table S1d. Ever, Current (at Least Once in the Last 30 Days), 5 or More, 10 or More, 20 or More of the Last 30 Days Measures of E-cigarette Use, Never Smokers 12 Months Ago, TUS-CPS, 2014/5

Supplementary Table S1e. Ever, Current (at Least Once in the Last 30 Days), 5 or More, 10 or More, 20 or More of the Last 30 Days Measures of E-cigarette Use, Total Males, TUS-CPS, 2014/5

Supplementary Table 1f. Ever, Current (at Least Once in the Last 30 Days), 5 or More, 10 or More, 20 or More of the Last 30 Days Measures of E-cigarette Use, Total Females, TUS-CPS, 2014/5

Supplementary Table S2a. Logistic Regression Equations, Male Smokers 12 Months Ago, Ever, Current (at Least Once in the Last 30 Days), 5 or More, 10 or More, 20 or More of the Last 30 Days Measures of E-cigarette Use, TUS-CPS, 2014/5

Supplementary Table S2b. Logistic Regression Equations, Female Smokers 12 Months Ago, Ever, Current (at Least Once in the Last 30 Days), 5 or More, 10 or More, 20 or More of the Last 30 Days Measures of E-cigarette Use, TUS-CPS, 2014/5

Supplementary Table S3a. Logistic Regression Equations, Male Former Smokers Who Quit More Than One Year and Less Than or Equal to Three Years, Ever, Current (at Least Once in the Last 30 Days), 5 or More, 10 or More, 20 or More of the Last 30 Days Measures of E-cigarette Use, TUS-CPS, 2014/5

Supplementary Table S3b. Logistic Regression Equations, Female Former Smokers Who Quit More Than One Year and Less Than or Equal to Three Years, Ever, Current (at Least Once in the Last 30 Days), 5 or More, 10 or More, 20 or More of the Last 30 Days Measures of E-cigarette Use, TUS-CPS, 2014/5

Supplementary Table S4a. Logistic Regression Equations, Male Former Smokers Who Quit More Than Three Years, Ever, Current (at Least Once in the Last 30 Days), 5 or More, 10 or More, 20 or More of the Last 30 Days Measures of E-cigarette Use, TUS-CPS, 2014/5

Supplementary Table S4b. Logistic Regression Equations, Female Former Smokers Who Quit More Than Three Years, Ever, Current (at Least Once in the Last 30 Days), 5 or More, 10 or More, 20 or More of the Last 30 Days Measures of E-cigarette Use, TUS-CPS, 2014/5

Supplementary Table S5a. Logistic Regression Equations, Male Never Smokers 12 Months Ago, Ever, Current (at Least Once in the Last 30 Days), 5 or More, 10 or More, 20 or More of the Last 30 Days Measures of E-cigarette Use, TUS-CPS, 2014/5

Supplementary Table S5b. Logistic Regression Equations, Female Never Smokers 12 Months Ago, Ever, Current (at Least Once in the Last 30 Days), 5 or More, 10 or More, 20 or More of the Last 30 Days Measures of E-cigarette Use, TUS-CPS, 2014/5

**Supplementary Table S1a. Ever, Current (at Least Once in the Last 30 Days), 5 or More, 10 or More, 20 or More of the Last 30 Days Measures of E-cigarette Use, Smokers 12 Months Ago, TUS-CPS, 2014/5**

| Variable               | Categories                                          | Sample Size  | Ever use     | $\chi^2$ p | Current use  | $\chi^2$ p | 5 more days | $\chi^2$ p | 10 more days | $\chi^2$ p | 20 more days | $\chi^2$ p | Ratio (current/ever use) | Ratio (regular/current use) |
|------------------------|-----------------------------------------------------|--------------|--------------|------------|--------------|------------|-------------|------------|--------------|------------|--------------|------------|--------------------------|-----------------------------|
| <b>Overall</b>         |                                                     | <b>21300</b> | <b>38.7%</b> |            | <b>11.4%</b> |            | <b>8.3%</b> |            | <b>6.9%</b>  |            | <b>4.8%</b>  |            | <b>29.6%</b>             | <b>42.0%</b>                |
| Gender                 | Male                                                | 10554        | 37.0%        | <0.001     | 10.7%        | 10.0       | 8.2%        | 0.5        | 7.0%         | 0.4        | 5.0%         | 2.3        | 29.0%                    | 46.8%                       |
|                        | Female                                              | 10746        | 40.3%        |            | 12.1%        | 0.002      | 8.5%        | 0.488      | 6.8%         | 0.530      | 4.6%         | 0.130      | 30.1%                    | 37.8%                       |
| Age                    | 18–24                                               | 1469         | 54.2%        | <0.001     | 14.6%        | 63.3       | 11.6%       | 54.8       | 9.7%         | 40.9       | 6.5%         | 25.0       | 26.9%                    | 44.4%                       |
|                        | 25–34                                               | 4181         | 47.2%        |            | 12.7%        |            | 9.2%        |            | 7.4%         |            | 5.3%         |            | 26.9%                    | 42.0%                       |
|                        | 35–44                                               | 4026         | 42.8%        |            | 12.9%        |            | 9.5%        |            | 7.7%         |            | 5.3%         |            | 30.1%                    | 40.8%                       |
|                        | 45–64                                               | 9013         | 34.5%        |            | 10.6%        |            | 7.5%        |            | 6.3%         |            | 4.4%         |            | 30.8%                    | 41.6%                       |
|                        | 65+                                                 | 2611         | 24.3%        |            | 8.1%         |            | 6.2%        |            | 5.2%         |            | 3.6%         |            | 33.4%                    | 43.9%                       |
| Race                   | White                                               | 17852        | 40.4%        | <0.001     | 12.1%        | 75.7       | 8.9%        | 70.1       | 7.3%         | 61.1       | 5.1%         | 40.9       | 29.9%                    | 42.4%                       |
|                        | Black                                               | 2182         | 24.2%        |            | 6.0%         |            | 3.7%        |            | 2.9%         |            | 2.1%         |            | 25.0%                    | 34.8%                       |
|                        | Asian                                               | 399          | 31.3%        |            | 8.3%         |            | 7.0%        |            | 6.8%         |            | 3.5%         |            | 26.4%                    | 42.4%                       |
|                        | Other Races                                         | 867          | 42.9%        |            | 12.8%        |            | 8.9%        |            | 8.0%         |            | 5.4%         |            | 29.8%                    | 42.3%                       |
| Hispanic               | Hispanic                                            | 1338         | 29.5%        | <0.001     | 8.4%         | 12.6       | 5.5%        | 15.6       | 4.6%         | 11.2       | 3.2%         | 7.8        | 28.6%                    | 38.1%                       |
|                        | Non-Hispanic                                        | 19962        | 39.3%        |            | 11.6%        |            | 8.5%        |            | 7.0%         |            | 4.9%         |            | 29.6%                    | 42.2%                       |
| Education              | Less than 12 years                                  | 3325         | 31.0%        | <0.001     | 8.6%         | 59.2       | 6.4%        | 36.6       | 4.8%         | 36.2       | 3.4%         | 24.4       | 27.8%                    | 39.5%                       |
|                        | High school degree                                  | 8374         | 36.7%        |            | 10.7%        |            | 7.9%        |            | 6.6%         |            | 4.6%         |            | 29.2%                    | 43.2%                       |
|                        | Associate degree                                    | 6947         | 43.9%        |            | 13.5%        |            | 9.7%        |            | 8.0%         |            | 5.6%         |            | 30.7%                    | 41.5%                       |
|                        | College degree or higher                            | 2654         | 41.0%        |            | 11.9%        |            | 8.7%        |            | 7.4%         |            | 5.0%         |            | 29.1%                    | 42.1%                       |
| Family income          | \$0 – \$19,999                                      | 5932         | 35.6%        | <0.001     | 10.6%        | 10.1       | 7.8%        | 12.2       | 6.4%         | 15.6       | 4.5%         | 9.4        | 29.9%                    | 42.1%                       |
|                        | \$20,000 – \$39,999                                 | 6014         | 37.9%        |            | 11.6%        |            | 8.5%        |            | 6.8%         |            | 4.7%         |            | 30.7%                    | 40.4%                       |
|                        | \$40,000 – \$74,999                                 | 5558         | 39.7%        |            | 11.2%        |            | 7.9%        |            | 6.5%         |            | 4.6%         |            | 28.3%                    | 41.0%                       |
|                        | \$75,000 or more                                    | 3796         | 43.3%        |            | 12.7%        |            | 9.6%        |            | 8.3%         |            | 5.7%         |            | 29.2%                    | 45.3%                       |
| Marital status         | Never Married                                       | 6062         | 41.4%        | <0.001     | 11.2%        | 3.6        | 8.3%        | 0.4        | 6.7%         | 0.5        | 4.7%         | 0.3        | 27.0%                    | 41.8%                       |
|                        | Married-Spouse Present                              | 7938         | 39.0%        |            | 12.0%        |            | 8.5%        |            | 7.0%         |            | 4.9%         |            | 30.7%                    | 40.5%                       |
|                        | Married-Spouse Absent or Widowed/Divorced/Separated | 7300         | 36.1%        |            | 11.1%        |            | 8.2%        |            | 6.9%         |            | 4.8%         |            | 30.7%                    | 43.8%                       |
| Employment status      | Employed                                            | 12341        | 41.1%        | <0.001     | 11.6%        | 0.9        | 8.7%        | 5.8        | 7.3%         | 8.4        | 5.2%         | 8.9        | 28.3%                    | 44.6%                       |
|                        | Not in labor force or unemployed                    | 8959         | 35.4%        |            | 11.2%        |            | 7.8%        |            | 6.3%         |            | 4.3%         |            | 31.7%                    | 38.3%                       |
| Metropolitan status    | MSA                                                 | 15070        | 38.9%        | 0.202      | 11.7%        | 2.9        | 8.6%        | 3.6        | 7.1%         | 5.2        | 5.0%         | 3.6        | 30.0%                    | 42.6%                       |
|                        | Non-MSA                                             | 6230         | 38.0%        |            | 10.9%        |            | 7.8%        |            | 6.3%         |            | 4.4%         |            | 28.5%                    | 40.2%                       |
| Indoor workers         | Yes                                                 | 7908         | 41.8%        | <0.001     | 12.2%        | 6.7        | 9.2%        | 10.7       | 7.6%         | 10.7       | 5.2%         | 5.6        | 29.1%                    | 43.1%                       |
|                        | No                                                  | 13392        | 36.8%        |            | 11.0%        |            | 7.9%        |            | 6.4%         |            | 4.5%         |            | 29.9%                    | 41.2%                       |
| Current smoking status | Current smokers                                     | 19002        | 37.7%        | <0.001     | 10.6%        | 126.9      | 7.3%        | 265.8      | 5.7%         | 389.4      | 3.6%         | 563.6      | 28.1%                    | 33.9%                       |
|                        | Ex-smokers (<1 year)                                | 2298         | 46.8%        |            | 18.5%        |            | 17.2%       |            | 16.7%        |            | 14.8%        |            | 39.5%                    | 80.0%                       |
| Smoking frequency      | Everyday smokers                                    | 17578        | 39.3%        | <0.001     | 11.6%        | 1.9        | 8.4%        | 0.3        | 7.0%         | 1.1        | 4.9%         | 3.0        | 29.5%                    | 42.5%                       |
|                        | Someday smokers                                     | 3722         | 35.9%        |            | 10.8%        |            | 8.1%        |            | 6.5%         |            | 4.2%         |            | 30.0%                    | 39.4%                       |
| Cigarette per day      | 1–4                                                 | 3849         | 32.7%        |            | 9.0%         |            | 6.7%        |            | 5.2%         |            | 3.7%         |            | 27.7%                    | 40.5%                       |
|                        | 5–14                                                | 7629         | 37.5%        |            | 10.6%        |            | 7.8%        |            | 6.4%         |            | 4.4%         |            | 28.3%                    | 41.8%                       |

|                                      |                    |       |       |         |       |        |       |        |      |        |      |        |       |       |
|--------------------------------------|--------------------|-------|-------|---------|-------|--------|-------|--------|------|--------|------|--------|-------|-------|
|                                      | 15–24              | 7896  | 41.3% | 115.6   | 12.5% | 62.0   | 9.0%  | 43.5   | 7.5% | 40.4   | 5.2% | 33.1   | 30.2% | 41.8% |
|                                      | 25+                | 1926  | 44.7% | <0.001  | 15.2% | <0.001 | 11.3% | <0.001 | 9.2% | <0.001 | 6.8% | <0.001 | 33.9% | 44.9% |
| First cigarette upon awakening§      | ≤ 5 min            | 3786  | 43.7% |         | 13.1% |        | 9.3%  |        | 7.9% |        | 5.9% |        | 30.0% | 45.3% |
|                                      | 5–30 min           | 7196  | 39.5% | 69.0    | 11.4% | 14.6   | 8.1%  | 5.8    | 6.7% | 7.9    | 4.3% | 14.3   | 28.9% | 38.1% |
|                                      | >30 min            | 10318 | 36.2% | <0.001  | 10.8% | 0.0    | 8.2%  | 0.1    | 6.6% | 0.0    | 4.7% | 0.0    | 29.9% | 43.4% |
| Smokeless tobacco use†               | Yes                | 2956  | 65.1% | 1007.34 | 16.7% | 14.10  | 9.9%  | 1.34   | 7.6% | 0.31   | 4.5% | 0.06   | -     | -     |
|                                      | No                 | 18344 | 34.4% | <0.001  | 11.3% | 0.0    | 8.3%  | 0.2    | 6.9% | 0.6    | 4.8% | 0.8    | -     | -     |
| State level cigarette tax ranking‡   | Lowest quarter     | 5263  | 39.1% |         | 12.5% |        | 9.1%  |        | 7.4% |        | 5.0% |        | 31.9% | 40.1% |
|                                      | Med-low quarter    | 6307  | 39.1% |         | 11.6% |        | 8.8%  |        | 7.4% |        | 5.2% |        | 29.7% | 45.0% |
|                                      | Med-high quarter   | 5205  | 39.1% | 5.6     | 11.2% | 12.5   | 7.8%  | 12.2   | 6.3% | 10.9   | 4.4% | 6.3    | 28.7% | 39.5% |
|                                      | Highest quarter    | 4525  | 37.1% | 0.132   | 10.2% | 0.006  | 7.4%  | 0.007  | 6.2% | 0.012  | 4.4% | 0.099  | 27.5% | 43.0% |
| Tobacco control spending per capita‡ | Lowest quarter     | 5647  | 39.0% |         | 12.7% |        | 9.2%  |        | 7.6% |        | 5.0% |        | 32.5% | 39.5% |
|                                      | Med-low quarter    | 5817  | 38.4% |         | 10.9% |        | 8.2%  |        | 6.7% |        | 4.8% |        | 28.5% | 43.6% |
|                                      | Med-high quarter   | 5628  | 38.5% | 0.6     | 11.7% | 18.1   | 8.4%  | 11.0   | 7.1% | 11.2   | 5.2% | 7.3    | 30.3% | 44.3% |
|                                      | Highest quarter    | 4208  | 38.8% | 0.894   | 10.1% | <0.001 | 7.4%  | 0.012  | 5.9% | 0.011  | 4.1% | 0.064  | 26.0% | 40.2% |
| State level worksite smoking ban     | Highest level      | 13252 | 38.6% | 0.2     | 10.9% | 8.3    | 7.9%  | 10.4   | 6.5% | 9.7    | 4.5% | 7.3    | 28.4% | 41.0% |
|                                      | Not highest level  | 8048  | 38.8% | 0.690   | 12.2% | 0.004  | 9.1%  | 0.001  | 7.6% | 0.002  | 5.3% | 0.007  | 31.5% | 43.4% |
| State level worksite e-cigarette ban | Highest level      | 785   | 38.5% | 0.0     | 11.5% | 0.0    | 7.9%  | 0.2    | 6.6% | 0.1    | 4.3% | 0.4    | 29.8% | 37.8% |
|                                      | Not highest level  | 20515 | 38.7% | 0.907   | 11.4% | 0.976  | 8.4%  | 0.643  | 6.9% | 0.779  | 4.8% | 0.533  | 29.6% | 42.1% |
| State level e-cigarette tax          | yes                | 396   | 45.2% | 7.3     | 10.4% | 0.5    | 8.3%  | 0.0    | 7.6% | 0.3    | 6.1% | 1.4    | 22.9% | 58.5% |
|                                      | no                 | 20904 | 38.5% | 0.007   | 11.5% | 0.496  | 8.3%  | 0.992  | 6.9% | 0.577  | 4.8% | 0.235  | 29.7% | 41.7% |
| Census division                      | East North Central | 2791  | 39.8% |         | 11.5% |        | 8.5%  |        | 6.7% |        | 4.7% |        | 28.9% | 40.5% |
|                                      | East South Central | 1966  | 36.9% |         | 11.5% |        | 9.0%  |        | 7.5% |        | 5.0% |        | 31.1% | 43.8% |
|                                      | Middle Atlantic    | 1573  | 37.4% |         | 10.4% |        | 7.5%  |        | 6.1% |        | 4.2% |        | 27.7% | 40.5% |
|                                      | Mountain           | 2387  | 41.9% |         | 14.1% |        | 9.8%  |        | 8.3% |        | 5.7% |        | 33.7% | 40.1% |
|                                      | New England        | 1765  | 36.1% |         | 9.9%  |        | 6.7%  |        | 5.7% |        | 4.1% |        | 27.4% | 41.1% |
|                                      | Pacific            | 1953  | 42.2% |         | 12.3% |        | 8.9%  |        | 7.7% |        | 5.6% |        | 29.1% | 45.4% |
|                                      | South Atlantic     | 3884  | 35.2% |         | 10.4% |        | 7.5%  |        | 6.2% |        | 4.5% |        | 29.5% | 43.4% |
|                                      | West North Central | 2517  | 42.3% | 65.8    | 12.0% | 30.3   | 8.9%  | 21.5   | 7.2% | 18.9   | 4.6% | 10.9   | 28.5% | 38.6% |
|                                      | West South Central | 2464  | 37.3% | <0.001  | 10.8% | <0.001 | 8.4%  | 0.006  | 6.7% | 0.015  | 4.8% | 0.206  | 29.0% | 44.6% |

§ The time reported for current smokers was their current habit while for quitters in last year was their habit one year ago; † Sample size for smokeless tobacco use was in terms of ever use.

For ever use, current use, 5 more days, 10 more days and 20 more days in last month, the number of respondents who use SLT with the same measure of e-cigarette are 2956, 496, 392, 327, and 246. The prevalence of e-cigarette use by five measures was estimated among SLT users who were categorized by the same measure; ‡ Data for state level cigarette tax ranking are in Jan 2015 and tobacco control spending per capita are in 2015.

**Supplementary Table S1b. Ever, Current (at Least Once in the Last 30 Days), 5 or More, 10 or More, 20 or More of the Last 30 Days Measures of E-cigarette Use, Former Smokers Who Quit More Than One Year and Less Than or Equal to Three Years, TUS-CPS, 2014/5**

| Variable                           | Categories                                          | Sample Size | Ever use | $\chi^2$ p | Current use | $\chi^2$ p | 5 more days | $\chi^2$ p | 10 more days | $\chi^2$ p | 20 more days | $\chi^2$ p | Ratio (current to ever use) | Ratio (20 days to current use) |
|------------------------------------|-----------------------------------------------------|-------------|----------|------------|-------------|------------|-------------|------------|--------------|------------|--------------|------------|-----------------------------|--------------------------------|
| Overall                            |                                                     | 2892        | 30.2%    |            | 9.8%        |            | 9.0%        |            | 8.5%         |            | 7.4%         |            | 32.5%                       | 75.4%                          |
| Gender                             | Male                                                | 1467        | 30.8%    | 0.5        | 9.3%        | 0.8        | 8.8%        | 0.2        | 8.5%         | 0.0        | 7.3%         | 0.0        | 30.3%                       | 78.1%                          |
|                                    | Female                                              | 1425        | 29.6%    | 0.483      | 10.3%       | 0.377      | 9.3%        | 0.659      | 8.6%         | 0.863      | 7.5%         | 0.825      | 34.8%                       | 72.8%                          |
| Age                                | 18–24                                               | 168         | 38.1%    |            | 7.1%        |            | 6.0%        |            | 6.0%         |            | 3.6%         |            | 18.8%                       | 50.0%                          |
|                                    | 25–34                                               | 776         | 34.4%    |            | 7.3%        |            | 6.3%        |            | 5.9%         |            | 5.2%         |            | 21.3%                       | 70.2%                          |
|                                    | 35–44                                               | 546         | 32.6%    |            | 11.9%       |            | 11.2%       |            | 10.3%        |            | 8.8%         |            | 36.5%                       | 73.8%                          |
|                                    | 45–64                                               | 1012        | 29.4%    | 44.6       | 11.8%       | 15.2       | 11.1%       | 18.3       | 10.6%        | 16.6       | 9.5%         | 18.2       | 39.9%                       | 80.7%                          |
|                                    | 65+                                                 | 390         | 17.2%    | <0.001     | 7.9%        | 0.4%       | 7.4%        | 0.1%       | 7.2%         | 0.2%       | 6.2%         | 0.1%       | 46.3%                       | 77.4%                          |
| Race                               | White                                               | 2526        | 30.8%    |            | 10.1%       |            | 9.3%        |            | 8.8%         |            | 7.6%         |            | 32.9%                       | 75.0%                          |
|                                    | Black                                               | 206         | 18.4%    |            | 3.4%        |            | 2.9%        |            | 2.9%         |            | 2.4%         |            | 18.4%                       | 71.4%                          |
|                                    | Asian                                               | 57          | 33.3%    | 17.1       | 12.3%       | 11.9       | 8.8%        | 12.3       | 8.8%         | 11.9       | 7.0%         | 11.7       | 36.8%                       | 57.1%                          |
|                                    | Other Races                                         | 103         | 37.9%    | 0.001      | 13.6%       | 0.008      | 13.6%       | 0.006      | 13.6%        | 0.008      | 12.6%        | 0.009      | 35.9%                       | 92.9%                          |
| Hispanic                           | Hispanic                                            | 210         | 23.8%    | 4.4        | 4.8%        | 6.5        | 3.8%        | 7.5        | 3.3%         | 7.9        | 3.3%         | 5.5        | 20.0%                       | 70.0%                          |
|                                    | Non-Hispanic                                        | 2682        | 30.7%    | 0.036      | 10.2%       | 0.011      | 9.4%        | 0.006      | 8.9%         | 0.005      | 7.7%         | 0.019      | 33.3%                       | 75.5%                          |
| Education                          | Less than 12 years                                  | 282         | 18.8%    |            | 7.1%        |            | 6.0%        |            | 6.0%         |            | 5.0%         |            | 37.7%                       | 70.0%                          |
|                                    | High school degree                                  | 882         | 27.9%    |            | 10.0%       |            | 9.4%        |            | 9.3%         |            | 8.2%         |            | 35.8%                       | 81.8%                          |
|                                    | Associate degree                                    | 1034        | 34.4%    | 29.0       | 11.6%       | 8.5        | 10.6%       | 8.9        | 9.8%         | 7.7        | 8.3%         | 6.3        | 33.7%                       | 71.7%                          |
|                                    | College degree or higher                            | 694         | 31.6%    | <0.001     | 8.1%        | 0.036      | 7.3%        | 0.031      | 6.8%         | 0.053      | 6.1%         | 0.098      | 25.6%                       | 75.0%                          |
| Family income                      | \$0–\$19,999                                        | 496         | 21.2%    |            | 6.9%        |            | 6.3%        |            | 5.8%         |            | 4.6%         |            | 32.4%                       | 67.6%                          |
|                                    | \$20,000–\$39,999                                   | 735         | 32.1%    |            | 9.9%        |            | 9.3%        |            | 9.1%         |            | 7.8%         |            | 30.9%                       | 78.1%                          |
|                                    | \$40,000–\$74,999                                   | 871         | 32.0%    | 23.3       | 9.9%        | 7.5        | 8.8%        | 7.6        | 8.4%         | 6.7        | 7.8%         | 6.9        | 30.8%                       | 79.1%                          |
|                                    | \$75,000 or more                                    | 790         | 32.2%    | <0.001     | 11.5%       | 0.057      | 10.8%       | 0.054      | 9.9%         | 0.081      | 8.4%         | 0.074      | 35.8%                       | 72.5%                          |
| Marital status                     | Never Married                                       | 758         | 33.4%    |            | 6.9%        |            | 5.8%        |            | 5.7%         |            | 5.0%         |            | 20.6%                       | 73.1%                          |
|                                    | Married-Spouse Present                              | 1332        | 30.0%    | 6.3        | 11.3%       | 10.8       | 10.5%       | 13.5       | 10.0%        | 11.6       | 8.7%         | 9.6        | 37.5%                       | 77.3%                          |
|                                    | Married-Spouse Absent or Widowed/Divorced/Separated | 802         | 27.6%    | 0.0        | 10.2%       | 0.0        | 9.6%        | 0.0        | 8.9%         | 0.0        | 7.5%         | 0.0        | 37.1%                       | 73.2%                          |
| Employment status                  | Employed                                            | 1835        | 33.8%    | 31.2       | 9.9%        | 0.1        | 9.2%        | 0.2        | 8.7%         | 0.2        | 7.6%         | 0.2        | 29.3%                       | 76.4%                          |
|                                    | Not in labor force or unemployed                    | 1057        | 23.9%    | <0.001     | 9.6%        | 0.815      | 8.7%        | 0.648      | 8.2%         | 0.651      | 7.1%         | 0.635      | 40.3%                       | 73.5%                          |
| Metropolitan status                | MSA                                                 | 2205        | 30.7%    | 0.8        | 10.5%       | 4.5        | 9.7%        | 4.6        | 9.2%         | 4.6        | 7.9%         | 3.3        | 34.2%                       | 75.3%                          |
|                                    | Non-MSA                                             | 687         | 28.8%    | 0.360      | 7.7%        | 0.034      | 7.0%        | 0.033      | 6.6%         | 0.033      | 5.8%         | 0.071      | 26.8%                       | 75.5%                          |
| Indoor workers                     | Yes                                                 | 1263        | 35.6%    | 31.1       | 10.6%       | 1.6        | 9.7%        | 1.4        | 9.3%         | 1.5        | 8.2%         | 2.3        | 29.8%                       | 77.6%                          |
|                                    | No                                                  | 1629        | 26.0%    | <0.001     | 9.2%        | 0.209      | 8.5%        | 0.238      | 8.0%         | 0.221      | 6.8%         | 0.131      | 35.4%                       | 73.3%                          |
| Smokeless tobacco use§             | Yes                                                 | 509         | 47.3%    | 85.9       | 6.5%        | 1.4        | 4.9%        | 2.3        | 5.1%         | 1.5        | 4.6%         | 1.0        | -                           | -                              |
|                                    | No                                                  | 2383        | 26.6%    | <0.001     | 9.9%        | 0.2        | 9.2%        | 0.1        | 8.7%         | 0.2        | 7.5%         | 0.3        | -                           | -                              |
| State level cigarette tax ranking† | Lowest quarter                                      | 632         | 30.5%    |            | 11.4%       |            | 10.4%       |            | 9.8%         |            | 9.2%         |            | 37.3%                       | 80.6%                          |
|                                    | Med-low quarter                                     | 833         | 29.4%    |            | 8.6%        |            | 8.3%        |            | 7.4%         |            | 6.4%         |            | 29.4%                       | 73.6%                          |
|                                    | Med-high quarter                                    | 771         | 30.4%    | 0.4        | 9.7%        | 3.1        | 8.7%        | 2.2        | 8.3%         | 2.8        | 6.7%         | 4.8        | 32.1%                       | 69.3%                          |
|                                    | Highest quarter                                     | 656         | 30.8%    | 0.941      | 9.9%        | 0.380      | 9.0%        | 0.530      | 9.0%         | 0.421      | 7.8%         | 0.184      | 32.2%                       | 78.5%                          |

|                                      |                    |      |       |        |       |       |       |       |       |       |       |       |       |       |
|--------------------------------------|--------------------|------|-------|--------|-------|-------|-------|-------|-------|-------|-------|-------|-------|-------|
| Tobacco control spending per capita† | Lowest quarter     | 752  | 30.3% |        | 11.3% |       | 11.0% |       | 10.5% |       | 9.7%  |       | 37.3% | 85.9% |
|                                      | Med-low quarter    | 754  | 28.4% |        | 9.3%  |       | 8.5%  |       | 8.0%  |       | 6.6%  |       | 32.7% | 71.4% |
|                                      | Med-high quarter   | 788  | 31.9% | 2.2    | 9.5%  | 2.6   | 8.2%  | 5.1   | 7.9%  | 5.1   | 6.5%  | 7.9   | 29.9% | 68.0% |
|                                      | Highest quarter    | 598  | 30.3% | 0.530  | 9.0%  | 0.455 | 8.2%  | 0.168 | 7.7%  | 0.168 | 6.7%  | 0.048 | 29.8% | 74.1% |
| State level worksite smoking ban     | Highest level      | 1838 | 29.8% | 0.5    | 9.2%  | 1.9   | 8.5%  | 1.4   | 8.2%  | 0.9   | 6.8%  | 2.6   | 31.1% | 73.5% |
|                                      | Not highest level  | 1054 | 31.0% | 0.476  | 10.8% | 0.173 | 9.9%  | 0.231 | 9.2%  | 0.335 | 8.4%  | 0.104 | 34.9% | 78.1% |
| State level e-cigarette ban          | Highest level      | 135  | 28.9% | 0.1    | 11.9% | 0.7   | 11.1% | 0.8   | 10.4% | 0.6   | 9.6%  | 1.0   | 41.0% | 81.3% |
|                                      | Not highest level  | 2757 | 30.3% | 0.730  | 9.7%  | 0.417 | 8.9%  | 0.386 | 8.5%  | 0.436 | 7.3%  | 0.311 | 32.1% | 75.0% |
| State level e-cigarette tax          | yes                | 56   | 37.5% | 1.4    | 17.9% | 4.2   | 14.3% | 1.9   | 14.3% | 2.4   | 10.7% | 0.9   | 47.6% | 60.0% |
|                                      | no                 | 2836 | 30.1% | 0.231  | 9.7%  | 0.041 | 8.9%  | 0.165 | 8.4%  | 0.120 | 7.3%  | 0.339 | 32.1% | 75.9% |
| Census division                      | East North Central | 377  | 30.2% |        | 8.2%  |       | 8.0%  |       | 7.2%  |       | 5.8%  |       | 27.2% | 71.0% |
|                                      | East South Central | 186  | 25.8% |        | 10.2% |       | 10.2% |       | 10.2% |       | 9.7%  |       | 39.6% | 94.7% |
|                                      | Middle Atlantic    | 227  | 22.0% |        | 8.8%  |       | 8.4%  |       | 8.4%  |       | 6.6%  |       | 40.0% | 75.0% |
|                                      | Mountain           | 373  | 39.4% |        | 13.9% |       | 12.1% |       | 11.3% |       | 10.5% |       | 35.4% | 75.0% |
|                                      | New England        | 263  | 22.8% |        | 8.4%  |       | 7.2%  |       | 6.8%  |       | 6.5%  |       | 36.7% | 77.3% |
|                                      | Pacific            | 327  | 32.1% |        | 7.0%  |       | 6.1%  |       | 5.8%  |       | 5.5%  |       | 21.9% | 78.3% |
|                                      | South Atlantic     | 481  | 29.5% |        | 9.1%  |       | 8.1%  |       | 7.5%  |       | 6.4%  |       | 31.0% | 70.5% |
|                                      | West North Central | 356  | 28.7% | 35.2   | 9.3%  | 16.4  | 8.4%  | 16.8  | 8.1%  | 16.3  | 6.5%  | 14.8  | 32.4% | 69.7% |
|                                      | West South Central | 302  | 35.1% | <0.001 | 13.2% | 0.037 | 13.2% | 0.033 | 12.6% | 0.038 | 10.3% | 0.063 | 37.7% | 77.5% |

§ Sample size for smokeless tobacco use was in terms of ever use. For ever use, current use, 5 more days, 10 more days and 20 more days in last month, the number of respondents who use SLT with the same measure of e-cigarette are 509, 108, 103, 98, and 87. The prevalence of e-cigarette use by five measures was estimated among SLT users who were categorized by the same measure;

† Data for state level cigarette tax ranking are in Jan 2015 and tobacco control spending per capita are in 2015.

**Supplementary Table S1c. Ever, Current (at Least Once in the Last 30 Days), 5 or More, 10 or More, 20 or More of the Last 30 Days Measures of E-cigarette Use, Former Smokers Who Quit More Than Three Years, TUS-CPS, 2014/5**

| Variable                           | Categories                                          | Sample Size  | Ever use    | $\chi^2$ p | Current use | $\chi^2$ p | 5 more days | $\chi^2$ p | 10 more days | $\chi^2$ p | 20 more days | $\chi^2$ p | Ratio (current to ever use) | Ratio (20 days to current use) |
|------------------------------------|-----------------------------------------------------|--------------|-------------|------------|-------------|------------|-------------|------------|--------------|------------|--------------|------------|-----------------------------|--------------------------------|
| <b>Overall</b>                     |                                                     | <b>27578</b> | <b>3.1%</b> |            | <b>0.5%</b> |            | <b>0.4%</b> |            | <b>0.4%</b>  |            | <b>0.3%</b>  |            | <b>17.5%</b>                | <b>59.1%</b>                   |
| Gender                             | Male                                                | 14674        | 3.3%        | 2.8        | 0.6%        | 4.4        | 0.5%        | 5.2        | 0.5%         | 6.5        | 0.4%         | 3.1        | 19.2%                       | 59.8%                          |
|                                    | Female                                              | 12904        | 2.9%        | 0.093      | 0.4%        | 0.036      | 0.3%        | 0.023      | 0.3%         | 0.011      | 0.3%         | 0.080      | 15.2%                       | 57.9%                          |
| Age                                | 18–24                                               | 91           | 25.3%       |            | 2.2%        |            | 2.2%        |            | 1.1%         |            | 1.1%         |            | 8.7%                        | 50.0%                          |
|                                    | 25–34                                               | 1711         | 13.3%       |            | 1.8%        |            | 1.3%        |            | 1.3%         |            | 1.1%         |            | 13.6%                       | 61.3%                          |
|                                    | 35–44                                               | 3033         | 6.5%        |            | 1.1%        |            | 0.9%        |            | 0.7%         |            | 0.5%         |            | 16.2%                       | 50.0%                          |
|                                    | 45–64                                               | 10613        | 2.9%        | 1081.2     | 0.6%        | 103.7      | 0.5%        | 77.4       | 0.5%         | 68.0       | 0.3%         | 54.4       | 20.6%                       | 57.8%                          |
|                                    | 65+                                                 | 12130        | 0.8%        | <0.001     | 0.2%        | <0.001     | 0.1%        | <0.001     | 0.1%         | <0.001     | 0.1%         | <0.001     | 21.1%                       | 75.0%                          |
| Race                               | White                                               | 24793        | 3.1%        |            | 0.6%        |            | 0.5%        |            | 0.4%         |            | 0.3%         |            | 17.9%                       | 61.2%                          |
|                                    | Black                                               | 1603         | 1.9%        |            | 0.2%        |            | 0.2%        |            | 0.2%         |            | 0.1%         |            | 9.7%                        | 66.7%                          |
|                                    | Asian                                               | 533          | 3.2%        | 11.4       | 0.0%        | 10.3       | 0.0%        | 5.6        | 0.0%         | 5.6        | 0.0%         | 4.6        | 0.0%                        | -                              |
|                                    | Other Races                                         | 649          | 4.5%        | 0.010      | 1.1%        | 0.016      | 0.3%        | 0.134      | 0.2%         | 0.131      | 0.2%         | 0.203      | 24.1%                       | 14.3%                          |
| Hispanic                           | Hispanic                                            | 1414         | 4.7%        | 13.5       | 0.9%        | 4.0        | 0.8%        | 5.4        | 0.8%         | 5.1        | 0.6%         | 2.9        | 19.4%                       | 61.5%                          |
|                                    | Non-Hispanic                                        | 26164        | 3.0%        | <0.001     | 0.5%        | 0.046      | 0.4%        | 0.020      | 0.4%         | 0.024      | 0.3%         | 0.091      | 17.3%                       | 58.8%                          |
| Education                          | Less than 12 years                                  | 2460         | 2.0%        |            | 0.6%        |            | 0.4%        |            | 0.4%         |            | 0.3%         |            | 28.0%                       | 50.0%                          |
|                                    | High school degree                                  | 8065         | 2.3%        |            | 0.4%        |            | 0.4%        |            | 0.3%         |            | 0.3%         |            | 18.3%                       | 67.6%                          |
|                                    | Associate degree                                    | 8463         | 4.0%        | 49.0       | 0.7%        | 5.7        | 0.5%        | 2.9        | 0.5%         | 2.6        | 0.4%         | 4.5        | 17.2%                       | 62.1%                          |
|                                    | College degree or higher                            | 8590         | 3.3%        | <0.001     | 0.5%        | 0.126      | 0.4%        | 0.407      | 0.4%         | 0.459      | 0.3%         | 0.216      | 15.4%                       | 51.2%                          |
| Family income                      | \$0–\$19,999                                        | 3994         | 3.0%        |            | 0.5%        |            | 0.4%        |            | 0.4%         |            | 0.3%         |            | 14.9%                       | 61.1%                          |
|                                    | \$20,000–\$39,999                                   | 6463         | 2.6%        |            | 0.7%        |            | 0.6%        |            | 0.5%         |            | 0.4%         |            | 25.4%                       | 62.8%                          |
|                                    | \$40,000–\$74,999                                   | 7915         | 2.8%        | 20.5       | 0.5%        | 2.8        | 0.4%        | 4.2        | 0.4%         | 3.4        | 0.3%         | 2.7        | 19.2%                       | 57.1%                          |
|                                    | \$75,000 or more                                    | 9206         | 3.7%        | <0.001     | 0.5%        | 0.428      | 0.4%        | 0.240      | 0.3%         | 0.336      | 0.3%         | 0.445      | 13.4%                       | 56.5%                          |
| Marital status                     | Never Married                                       | 2669         | 7.0%        |            | 1.0%        |            | 0.8%        |            | 0.7%         |            | 0.6%         |            | 13.8%                       | 57.7%                          |
|                                    | Married-Spouse Present                              | 16340        | 2.7%        | 154.0      | 0.5%        | 10.4       | 0.4%        | 7.8        | 0.4%         | 8.6        | 0.3%         | 5.7        | 18.1%                       | 62.5%                          |
|                                    | Married-Spouse Absent or Widowed/Divorced/Separated | 8569         | 2.6%        | <0.001     | 0.5%        | 0.0        | 0.4%        | 0.0        | 0.4%         | 0.0        | 0.3%         | 0.1        | 19.2%                       | 53.5%                          |
| Employment status                  | Employed                                            | 13475        | 4.5%        | 164.3      | 0.7%        | 21.5       | 0.6%        | 15.7       | 0.5%         | 12.0       | 0.4%         | 6.6        | 16.8%                       | 54.5%                          |
|                                    | Not in labor force or unemployed                    | 14103        | 1.8%        | <0.001     | 0.3%        | <0.001     | 0.3%        | <0.001     | 0.3%         | 0.001      | 0.2%         | 0.010      | 19.0%                       | 68.8%                          |
| Metropolitan status                | MSA                                                 | 20830        | 3.3%        | 9.3        | 0.6%        | 0.2        | 0.5%        | 0.4        | 0.4%         | 0.3        | 0.3%         | 0.1        | 16.9%                       | 56.5%                          |
|                                    | Non-MSA                                             | 6748         | 2.5%        | 0.002      | 0.5%        | 0.639      | 0.4%        | 0.515      | 0.4%         | 0.596      | 0.3%         | 0.716      | 19.9%                       | 67.6%                          |
| Indoor workers                     | Yes                                                 | 8548         | 4.7%        | 104.0      | 0.8%        | 16.4       | 0.7%        | 21.8       | 0.6%         | 15.6       | 0.5%         | 8.6        | 17.3%                       | 58.0%                          |
|                                    | No                                                  | 19030        | 2.4%        | <0.001     | 0.4%        | <0.001     | 0.3%        | <0.001     | 0.3%         | <0.001     | 0.3%         | 0.003      | 17.7%                       | 60.0%                          |
| Smokeless tobacco use§             | Yes                                                 | 3768         | 8.0%        | 356.5      | 1.6%        | 12.6       | 1.0%        | 4.1        | 0.8%         | 2.8        | 0.0%         | 1.8        | -                           | -                              |
|                                    | No                                                  | 23810        | 2.3%        | <0.001     | 0.5%        | 0.0        | 0.4%        | 0.0        | 0.4%         | 0.1        | 0.3%         | 0.2        | -                           | -                              |
| State level cigarette tax ranking† | Lowest quarter                                      | 5302         | 2.9%        |            | 0.6%        |            | 0.5%        |            | 0.5%         |            | 0.4%         |            | 20.5%                       | 65.6%                          |
|                                    | Med-low quarter                                     | 7677         | 3.3%        |            | 0.6%        |            | 0.5%        |            | 0.5%         |            | 0.4%         |            | 19.5%                       | 59.2%                          |
|                                    | Med-high quarter                                    | 7147         | 3.2%        | 2.7        | 0.5%        | 3.4        | 0.4%        | 3.6        | 0.3%         | 2.5        | 0.3%         | 3.9        | 15.2%                       | 60.0%                          |
|                                    | Highest quarter                                     | 7452         | 2.9%        | 0.434      | 0.4%        | 0.331      | 0.4%        | 0.311      | 0.3%         | 0.468      | 0.2%         | 0.272      | 15.3%                       | 51.5%                          |

|                                      |                    |       |      |        |      |       |      |       |      |       |      |       |       |       |
|--------------------------------------|--------------------|-------|------|--------|------|-------|------|-------|------|-------|------|-------|-------|-------|
| Tobacco control spending per capita† | Lowest quarter     | 6895  | 2.9% |        | 0.5% |       | 0.4% |       | 0.4% |       | 0.3% |       | 17.2% | 68.6% |
|                                      | Med-low quarter    | 7310  | 2.9% |        | 0.5% |       | 0.5% |       | 0.4% |       | 0.3% |       | 18.9% | 60.0% |
|                                      | Med-high quarter   | 8075  | 3.3% | 2.9    | 0.6% | 0.5   | 0.5% | 0.8   | 0.4% | 2.5   | 0.3% | 1.2   | 17.7% | 57.4% |
|                                      | Highest quarter    | 5298  | 3.2% | 0.404  | 0.5% | 0.919 | 0.4% | 0.846 | 0.3% | 0.484 | 0.2% | 0.761 | 15.7% | 48.1% |
| State level worksite smoking ban     | Highest level      | 17963 | 3.2% | 0.6    | 0.5% | 0.3   | 0.4% | 0.2   | 0.4% | 0.2   | 0.3% | 2.0   | 16.6% | 54.3% |
|                                      | Not highest level  | 9615  | 3.0% | 0.448  | 0.6% | 0.599 | 0.5% | 0.688 | 0.4% | 0.698 | 0.4% | 0.157 | 19.2% | 67.3% |
| State level worksite e-cigarette ban | Highest level      | 1114  | 4.3% | 5.7    | 0.3% | 1.6   | 0.1% | 3.3   | 0.1% | 2.9   | 0.1% | 1.9   | 6.3%  | 33.3% |
|                                      | Not highest level  | 26464 | 3.0% | 0.017  | 0.6% | 0.208 | 0.5% | 0.069 | 0.4% | 0.090 | 0.3% | 0.166 | 18.1% | 59.6% |
| State level e-cigarette tax          | yes                | 597   | 2.3% | 1.1    | 0.8% | 1.0   | 0.5% | 0.0   | 0.5% | 0.1   | 0.5% | 0.6   | 35.7% | 60.0% |
|                                      | no                 | 26981 | 3.1% | 0.286  | 0.5% | 0.317 | 0.4% | 0.834 | 0.4% | 0.708 | 0.3% | 0.422 | 17.2% | 59.0% |
| Census division                      | East North Central | 3384  | 3.3% |        | 0.5% |       | 0.4% |       | 0.4% |       | 0.3% |       | 15.2% | 64.7% |
|                                      | East South Central | 1591  | 2.9% |        | 0.8% |       | 0.8% |       | 0.7% |       | 0.4% |       | 26.1% | 58.3% |
|                                      | Middle Atlantic    | 2501  | 2.4% |        | 0.2% |       | 0.1% |       | 0.1% |       | 0.0% |       | 6.6%  | 25.0% |
|                                      | Mountain           | 3051  | 4.5% |        | 0.9% |       | 0.7% |       | 0.6% |       | 0.5% |       | 20.3% | 57.1% |
|                                      | New England        | 3384  | 2.0% |        | 0.2% |       | 0.2% |       | 0.2% |       | 0.1% |       | 11.6% | 50.0% |
|                                      | Pacific            | 3548  | 3.4% |        | 0.5% |       | 0.4% |       | 0.4% |       | 0.3% |       | 15.0% | 55.6% |
|                                      | South Atlantic     | 4863  | 2.6% |        | 0.5% |       | 0.4% |       | 0.4% |       | 0.3% |       | 20.6% | 65.4% |
|                                      | West North Central | 3039  | 3.4% | 45.1   | 0.6% | 26.3  | 0.4% | 23.1  | 0.4% | 21.1  | 0.2% | 25.2  | 16.7% | 41.2% |
|                                      | West South Central | 2217  | 3.6% | <0.001 | 0.9% | 0.001 | 0.8% | 0.003 | 0.7% | 0.007 | 0.7% | 0.002 | 24.1% | 78.9% |

§ Sample size for smokeless tobacco use was in terms of ever use. For ever use, current use, 5 more days, 10 more days and 20 more days in last month, the number of respondents who use SLT with the same measure of e-cigarette are 3768, 643, 610, 598, and 545. The prevalence of e-cigarette use by five measures was estimated among SLT users who were categorized by the same measure; † Data for state level cigarette tax ranking are in Jan 2015 and tobacco control spending per capita are in 2015.

**Supplementary Table S1d. Ever, Current (at Least Once in the Last 30 Days), 5 or More, 10 or More, 20 or More of the Last 30 Days Measures of E-cigarette Use, Never Smokers 12 Months Ago, TUS-CPS, 2014/5**

| Variable               | Categories                                          | Sample Size   | Ever use    | $\chi^2$ p | Current use | $\chi^2$ p | 5 more days | $\chi^2$ p | 10 more days | $\chi^2$ p | 20 more days | $\chi^2$ p | Ratio (current ever use) | Ratio (20 days to current use) |
|------------------------|-----------------------------------------------------|---------------|-------------|------------|-------------|------------|-------------|------------|--------------|------------|--------------|------------|--------------------------|--------------------------------|
| <b>Overall</b>         |                                                     | <b>106034</b> | <b>1.9%</b> |            | <b>0.3%</b> |            | <b>0.2%</b> |            | <b>0.2%</b>  |            | <b>0.1%</b>  |            | <b>17.5%</b>             | <b>34.4%</b>                   |
| Gender                 | Male                                                | 43492         | 2.5%        |            | 0.4%        |            | 0.3%        |            | 0.2%         |            | 0.2%         |            | 17.5%                    | 36.1%                          |
|                        | Female                                              | 62542         | 1.5%        | <0.001     | 0.3%        | <0.001     | 0.2%        | <0.001     | 0.1%         | <0.001     | 0.1%         | <0.001     | 17.4%                    | 32.3%                          |
| Age                    | 18–24                                               | 8657          | 7.3%        |            | 1.3%        |            | 0.8%        |            | 0.6%         |            | 0.3%         |            | 17.8%                    | 26.8%                          |
|                        | 25–34                                               | 18840         | 3.9%        |            | 0.6%        |            | 0.4%        |            | 0.4%         |            | 0.2%         |            | 16.2%                    | 37.8%                          |
|                        | 35–44                                               | 18431         | 1.6%        |            | 0.3%        |            | 0.2%        |            | 0.2%         |            | 0.1%         |            | 17.4%                    | 44.2%                          |
|                        | 45–64                                               | 37396         | 0.7%        | 2371.9     | 0.1%        | 390.1      | 0.1%        | 230.7      | 0.1%         | 161.5      | 0.0%         | 99.8       | 18.6%                    | 30.8%                          |
|                        | 65+                                                 | 22710         | 0.2%        | <0.001     | 0.1%        | <0.001     | 0.0%        | <0.001     | 0.0%         | <0.001     | 0.0%         | <0.001     | 25.5%                    | 42.9%                          |
| Race                   | White                                               | 85640         | 1.9%        |            | 0.3%        |            | 0.2%        |            | 0.2%         |            | 0.1%         |            | 17.8%                    | 36.9%                          |
|                        | Black                                               | 12138         | 1.2%        |            | 0.2%        |            | 0.2%        |            | 0.1%         |            | 0.1%         |            | 18.1%                    | 30.8%                          |
|                        | Asian                                               | 5383          | 1.2%        | 143.3      | 0.1%        | 22.6       | 0.0%        | 17.7       | 0.0%         | 14.0       | 0.0%         | 10.0       | 12.1%                    | 0.0%                           |
|                        | Other Races                                         | 2873          | 4.4%        | <0.001     | 0.7%        | <0.001     | 0.4%        | 0.001      | 0.2%         | 0.003      | 0.1%         | 0.018      | 15.9%                    | 15.0%                          |
| Hispanic               | Hispanic                                            | 13700         | 1.9%        | 0.0        | 0.3%        | 0.2        | 0.2%        | 2.1        | 0.1%         | 2.4        | 0.1%         | 0.9        | 16.5%                    | 28.6%                          |
|                        | Non-Hispanic                                        | 92334         | 1.9%        | 0.839      | 0.3%        | 0.621      | 0.2%        | 0.144      | 0.2%         | 0.118      | 0.1%         | 0.340      | 17.6%                    | 35.2%                          |
| Education              | Less than 12 years                                  | 9728          | 1.3%        |            | 0.3%        |            | 0.2%        |            | 0.2%         |            | 0.1%         |            | 21.1%                    | 22.2%                          |
|                        | High school degree                                  | 26836         | 1.9%        |            | 0.4%        |            | 0.3%        |            | 0.2%         |            | 0.2%         |            | 23.3%                    | 40.5%                          |
|                        | Associate degree                                    | 29222         | 2.8%        | 186.7      | 0.5%        | 84.0       | 0.4%        | 61.5       | 0.3%         | 47.3       | 0.2%         | 40.3       | 18.6%                    | 34.0%                          |
|                        | College degree or higher                            | 40248         | 1.4%        | <0.001     | 0.1%        | <0.001     | 0.1%        | <0.001     | 0.1%         | <0.001     | 0.0%         | <0.001     | 9.9%                     | 28.6%                          |
| Family income          | \$0–\$19,999                                        | 16737         | 2.3%        |            | 0.5%        |            | 0.3%        |            | 0.2%         |            | 0.2%         |            | 20.7%                    | 32.5%                          |
|                        | \$20,000–\$39,999                                   | 22943         | 2.0%        |            | 0.4%        |            | 0.2%        |            | 0.2%         |            | 0.1%         |            | 19.1%                    | 36.4%                          |
|                        | \$40,000–\$74,999                                   | 28917         | 1.9%        | 39.8       | 0.3%        | 21.4       | 0.2%        | 8.7        | 0.2%         | 9.1        | 0.1%         | 7.7        | 15.6%                    | 36.4%                          |
|                        | \$75,000 or more                                    | 37437         | 1.6%        | <0.001     | 0.2%        | <0.001     | 0.2%        | 0.034      | 0.1%         | 0.027      | 0.1%         | 0.053      | 15.9%                    | 32.3%                          |
| Marital status         | Never Married                                       | 24738         | 4.5%        |            | 0.8%        |            | 0.5%        |            | 0.4%         |            | 0.2%         |            | 17.1%                    | 31.3%                          |
|                        | Married-Spouse Present                              | 57401         | 1.0%        | 1229.7     | 0.2%        | 203.6      | 0.1%        | 120.2      | 0.1%         | 76.7       | 0.1%         | 55.8       | 15.3%                    | 33.0%                          |
|                        | Married-Spouse Absent or Widowed/Divorced/Separated | 23895         | 1.2%        | <0.001     | 0.3%        | <0.001     | 0.2%        | <0.001     | 0.2%         | <0.001     | 0.1%         | <0.001     | 23.7%                    | 45.5%                          |
| Employment status      | Employed                                            | 66199         | 2.2%        | 118.4      | 0.4%        | 10.4       | 0.3%        | 11.8       | 0.2%         | 10.3       | 0.1%         | 6.1        | 16.7%                    | 35.6%                          |
|                        | Not in labor force or unemployed                    | 39835         | 1.3%        | <0.001     | 0.3%        | 0.001      | 0.2%        | 0.001      | 0.1%         | 0.001      | 0.1%         | 0.014      | 19.7%                    | 31.4%                          |
| Metropolitan status    | MSA                                                 | 83965         | 1.9%        | 4.2        | 0.3%        | 0.8        | 0.2%        | 0.4        | 0.2%         | 0.1        | 0.1%         | 2.5        | 17.5%                    | 36.0%                          |
|                        | Non-MSA                                             | 22069         | 1.7%        | 0.042      | 0.3%        | 0.381      | 0.2%        | 0.529      | 0.2%         | 0.729      | 0.1%         | 0.117      | 17.4%                    | 27.3%                          |
| Indoor workers         | Yes                                                 | 46612         | 2.3%        | 75.7       | 0.4%        | 4.0        | 0.3%        | 1.4        | 0.2%         | 1.0        | 0.1%         | 0.6        | 16.1%                    | 33.1%                          |
|                        | No                                                  | 59422         | 1.6%        | <0.001     | 0.3%        | 0.045      | 0.2%        | 0.231      | 0.2%         | 0.316      | 0.1%         | 0.434      | 19.1%                    | 35.6%                          |
| Current smoking status | Current smokers                                     | 1380          | 35.0%       | 8298.2     | 9.6%        | 3635.8     | 7.5%        | 3172.9     | 6.2%         | 2843.1     | 3.7%         | 1587.4     | 27.3%                    | 38.6%                          |
|                        | Never smokers                                       | 104654        | 1.4%        | <0.001     | 0.2%        | <0.001     | 0.1%        | <0.001     | 0.1%         | <0.001     | 0.1%         | <0.001     | 14.3%                    | 31.8%                          |
| Smokeless tobacco use§ | Yes                                                 | 4695          | 10.8%       | 2092.9     | 1.2%        | 29.1       | 0.8%        | 17.2       | 0.7%         | 22.5       | 0.1%         | 0.0        | -                        | -                              |
|                        | No                                                  | 101339        | 1.5%        | <0.001     | 0.3%        | <0.001     | 0.2%        | <0.001     | 0.2%         | <0.001     | 0.1%         | 0.9        | -                        | -                              |
|                        | Lowest quarter                                      | 21631         | 1.8%        |            | 0.4%        |            | 0.3%        |            | 0.2%         |            | 0.1%         |            | 22.3%                    | 34.1%                          |

|                                      |           |                    |        |      |        |      |       |      |       |      |       |      |       |       |       |
|--------------------------------------|-----------|--------------------|--------|------|--------|------|-------|------|-------|------|-------|------|-------|-------|-------|
| State cigarette ranking†             | level tax | Med-low quarter    | 31972  | 1.9% |        | 0.3% |       | 0.2% |       | 0.2% |       | 0.1% |       | 16.9% | 42.7% |
|                                      |           | Med-high quarter   | 26764  | 2.0% | 3.0    | 0.4% | 7.3   | 0.2% | 3.5   | 0.2% | 4.2   | 0.1% | 5.2   | 18.0% | 26.3% |
|                                      |           | Highest quarter    | 25667  | 1.9% | 0.398  | 0.3% | 0.062 | 0.2% | 0.324 | 0.1% | 0.240 | 0.1% | 0.160 | 13.8% | 33.3% |
| Tobacco control spending per capita† |           | Lowest quarter     | 27464  | 1.8% |        | 0.3% |       | 0.2% |       | 0.1% |       | 0.1% |       | 16.6% | 24.1% |
|                                      |           | Med-low quarter    | 26310  | 1.8% |        | 0.3% |       | 0.2% |       | 0.2% |       | 0.1% |       | 18.6% | 39.1% |
|                                      |           | Med-high quarter   | 34777  | 1.9% | 5.7    | 0.3% | 1.3   | 0.2% | 1.3   | 0.2% | 3.1   | 0.1% | 5.4   | 17.2% | 39.1% |
|                                      |           | Highest quarter    | 17483  | 2.1% | 0.128  | 0.4% | 0.720 | 0.3% | 0.737 | 0.2% | 0.379 | 0.1% | 0.142 | 17.7% | 32.8% |
| State worksite smoking ban           | level     | Highest level      | 65143  | 1.9% | 0.5    | 0.3% | 1.3   | 0.2% | 0.2   | 0.2% | 0.3   | 0.1% | 0.0   | 16.8% | 35.8% |
|                                      |           | Not highest level  | 40891  | 1.9% | 0.490  | 0.4% | 0.251 | 0.2% | 0.644 | 0.2% | 0.559 | 0.1% | 0.892 | 18.5% | 32.4% |
| State worksite e-cigarette ban       | level     | Highest level      | 5062   | 1.5% | 4.6    | 0.3% | 0.0   | 0.2% | 0.3   | 0.1% | 0.4   | 0.1% | 0.1   | 21.3% | 31.3% |
|                                      |           | Not highest level  | 100972 | 1.9% | 0.031  | 0.3% | 0.868 | 0.2% | 0.611 | 0.2% | 0.508 | 0.1% | 0.755 | 17.3% | 34.5% |
| State level e-cigarette tax          |           | yes                | 1917   | 1.8% | 0.1    | 0.3% | 0.3   | 0.2% | 0.0   | 0.2% | 0.0   | 0.2% | 0.3   | 14.7% | 60.0% |
|                                      |           | no                 | 104117 | 1.9% | 0.721  | 0.3% | 0.598 | 0.2% | 0.837 | 0.2% | 0.834 | 0.1% | 0.569 | 17.5% | 34.0% |
| Census division                      |           | East North Central | 11428  | 1.9% |        | 0.3% |       | 0.2% |       | 0.2% |       | 0.1% |       | 17.1% | 40.5% |
|                                      |           | East South Central | 7112   | 1.6% |        | 0.3% |       | 0.3% |       | 0.2% |       | 0.1% |       | 21.1% | 37.5% |
|                                      |           | Middle Atlantic    | 8865   | 1.4% |        | 0.2% |       | 0.1% |       | 0.1% |       | 0.0% |       | 14.0% | 23.5% |
|                                      |           | Mountain           | 12876  | 2.4% |        | 0.5% |       | 0.4% |       | 0.3% |       | 0.2% |       | 18.8% | 46.6% |
|                                      |           | New England        | 8771   | 1.3% |        | 0.2% |       | 0.1% |       | 0.1% |       | 0.0% |       | 14.8% | 23.5% |
|                                      |           | Pacific            | 15102  | 2.4% |        | 0.3% |       | 0.2% |       | 0.2% |       | 0.1% |       | 13.9% | 30.0% |
|                                      |           | South Atlantic     | 20399  | 1.6% |        | 0.3% |       | 0.2% |       | 0.2% |       | 0.1% |       | 21.1% | 34.3% |
|                                      |           | West North Central | 10486  | 2.1% | 87.2   | 0.3% | 18.5  | 0.2% | 19.1  | 0.2% | 15.6  | 0.1% | 18.8  | 14.7% | 30.3% |
|                                      |           | West South Central | 10995  | 2.0% | <0.001 | 0.4% | 0.018 | 0.3% | 0.015 | 0.2% | 0.048 | 0.1% | 0.016 | 20.9% | 28.3% |

§ Sample size for smokeless tobacco use was in terms of ever use. For ever use, current use, 5 more days, 10 more days and 20 more days in last month, the number of respondents who use SLT with the same measure of e-cigarette are 4695, 1388, 1273, 1207, and 1043. The prevalence of e-cigarette use by five measures was estimated among SLT users who were categorized by the same measure; † Data for state level cigarette tax ranking are in Jan 2015 and tobacco control spending per capita are in 2015.

**Supplementary Table S1e. Ever, Current (at Least Once in the Last 30 Days), 5 or More, 10 or More, 20 or More of the Last 30 Days Measures of E-cigarette Use, Total Males, TUS-CPS, 2014/5**

| Variable               | Categories                                          | Sample Size  | Ever use    | $\chi^2$ p | Current use | $\chi^2$ p | 5 more days | $\chi^2$ p | 10 more days | $\chi^2$ p | 20 more days | $\chi^2$ p | Ratio (current to ever use) | Ratio (20 days to current use) |
|------------------------|-----------------------------------------------------|--------------|-------------|------------|-------------|------------|-------------|------------|--------------|------------|--------------|------------|-----------------------------|--------------------------------|
| <b>Overall</b>         |                                                     | <b>70588</b> | <b>8.6%</b> |            | <b>2.3%</b> |            | <b>1.8%</b> |            | <b>1.5%</b>  |            | <b>1.1%</b>  |            | <b>26.4%</b>                | <b>49.7%</b>                   |
| Age                    | 18–24                                               | 4808         | 18.2%       |            | 4.0%        |            | 3.1%        |            | 2.6%         |            | 1.9%         |            | 22.0%                       | 48.4%                          |
|                        | 25–34                                               | 11473        | 15.6%       |            | 3.7%        |            | 2.8%        |            | 2.4%         |            | 1.8%         |            | 24.0%                       | 48.1%                          |
|                        | 35–44                                               | 11867        | 10.2%       |            | 2.9%        |            | 2.4%        |            | 2.1%         |            | 1.5%         |            | 28.8%                       | 52.0%                          |
|                        | 45–64                                               | 26515        | 6.8%        | 2182.8     | 2.0%        | 384.4      | 1.6%        | 278.7      | 1.3%         | 232.6      | 1.0%         | 176.0      | 28.8%                       | 48.7%                          |
|                        | 65+                                                 | 15925        | 2.4%        | <0.001     | 0.7%        | <0.001     | 0.6%        | <0.001     | 0.5%         | <0.001     | 0.4%         | <0.001     | 29.1%                       | 54.9%                          |
| Race                   | White                                               | 59238        | 8.9%        |            | 2.4%        |            | 1.9%        |            | 1.6%         |            | 1.2%         |            | 26.8%                       | 51.0%                          |
|                        | Black                                               | 6385         | 5.7%        |            | 1.3%        |            | 0.9%        |            | 0.7%         |            | 0.5%         |            | 22.7%                       | 39.8%                          |
|                        | Asian                                               | 3048         | 5.0%        | 193.1      | 1.1%        | 69.4       | 0.7%        | 63.3       | 0.7%         | 54.5       | 0.4%         | 43.7       | 21.7%                       | 36.4%                          |
|                        | Other Races                                         | 1917         | 13.8%       | <0.001     | 3.8%        | <0.001     | 2.6%        | <0.001     | 2.3%         | <0.001     | 1.6%         | <0.001     | 27.2%                       | 41.7%                          |
| Hispanic               | Hispanic                                            | 7375         | 5.7%        | 86.4       | 1.3%        | 32.2       | 0.9%        | 36.9       | 0.7%         | 35.3       | 0.5%         | 26.6       | 23.4%                       | 39.4%                          |
|                        | Non-Hispanic                                        | 63213        | 8.9%        | <0.001     | 2.4%        | <0.001     | 1.9%        | <0.001     | 1.6%         | <0.001     | 1.2%         | <0.001     | 26.6%                       | 50.3%                          |
| Education              | Less than 12 years                                  | 7096         | 8.9%        |            | 2.2%        |            | 1.7%        |            | 1.4%         |            | 1.0%         |            | 25.0%                       | 44.3%                          |
|                        | High school degree                                  | 19993        | 10.3%       |            | 2.8%        |            | 2.2%        |            | 1.9%         |            | 1.5%         |            | 27.2%                       | 52.0%                          |
|                        | Associate degree                                    | 19466        | 11.2%       | 657.4      | 3.2%        | 241.5      | 2.5%        | 180.7      | 2.1%         | 148.6      | 1.5%         | 119.9      | 28.2%                       | 48.6%                          |
|                        | College degree or higher                            | 24033        | 4.9%        | <0.001     | 1.1%        | <0.001     | 0.9%        | <0.001     | 0.8%         | <0.001     | 0.6%         | <0.001     | 22.5%                       | 50.4%                          |
| Family income          | \$0–\$19,999                                        | 10232        | 11.1%       |            | 2.8%        |            | 2.1%        |            | 1.8%         |            | 1.3%         |            | 25.2%                       | 47.9%                          |
|                        | \$20,000–\$39,999                                   | 15368        | 10.3%       |            | 3.0%        |            | 2.4%        |            | 2.0%         |            | 1.5%         |            | 29.2%                       | 50.8%                          |
|                        | \$40,000–\$74,999                                   | 20068        | 8.7%        | 280.3      | 2.2%        | 88.3       | 1.7%        | 59.6       | 1.5%         | 50.3       | 1.1%         | 44.2       | 24.8%                       | 49.3%                          |
|                        | \$75,000 or more                                    | 24920        | 6.5%        | <0.001     | 1.7%        | <0.001     | 1.4%        | <0.001     | 1.2%         | <0.001     | 0.9%         | <0.001     | 26.3%                       | 50.0%                          |
| Marital status         | Never Married                                       | 16970        | 14.2%       |            | 3.3%        |            | 2.6%        |            | 2.2%         |            | 1.6%         |            | 23.5%                       | 47.4%                          |
|                        | Married-Spouse Present                              | 39584        | 5.8%        | 1092.3     | 1.7%        | 165.2      | 1.3%        | 116.6      | 1.2%         | 88.1       | 0.9%         | 62.2       | 28.6%                       | 51.7%                          |
|                        | Married-Spouse Absent or Widowed/Divorced/Separated | 14034        | 9.6%        | <0.001     | 2.7%        | <0.001     | 2.1%        | <0.001     | 1.8%         | <0.001     | 1.3%         | <0.001     | 27.9%                       | 49.5%                          |
| Employment status      | Employed                                            | 46738        | 9.3%        | 84.5       | 2.4%        | 14.1       | 1.9%        | 17.6       | 1.7%         | 14.5       | 1.2%         | 12.7       | 26.1%                       | 50.8%                          |
|                        | Not in labor force or unemployed                    | 23850        | 7.2%        | <0.001     | 2.0%        | <0.001     | 1.5%        | <0.001     | 1.3%         | <0.001     | 0.9%         | <0.001     | 27.3%                       | 47.0%                          |
| Metropolitan status    | MSA                                                 | 54742        | 8.3%        | 23.0       | 2.3%        | 0.5        | 1.8%        | 0.1        | 1.5%         | 0.3        | 1.1%         | 0.3        | 27.0%                       | 49.6%                          |
|                        | Non-MSA                                             | 15846        | 9.5%        | <0.001     | 2.3%        | 0.479      | 1.8%        | 0.742      | 1.6%         | 0.597      | 1.2%         | 0.603      | 24.6%                       | 49.7%                          |
| Indoor workers         | Yes                                                 | 26872        | 9.3%        | 23.9       | 2.5%        | 11.4       | 2.0%        | 11.0       | 1.7%         | 9.7        | 1.3%         | 9.3        | 27.1%                       | 51.0%                          |
|                        | No                                                  | 43716        | 8.2%        | <0.001     | 2.1%        | 0.001      | 1.7%        | 0.001      | 1.4%         | 0.002      | 1.0%         | 0.002      | 25.9%                       | 48.7%                          |
| Current smoking status | Current smokers                                     | 10005        | 35.8%       |            | 9.7%        |            | 7.0%        |            | 5.7%         |            | 3.7%         |            | 27.0%                       | 37.8%                          |
|                        | Never smokers                                       | 42853        | 2.0%        |            | 0.3%        |            | 0.2%        |            | 0.2%         |            | 0.1%         |            | 14.7%                       | 33.6%                          |
|                        | Ex-smokers (<1 year)                                | 1589         | 43.5%       |            | 17.7%       |            | 16.7%       |            | 16.2%        |            | 14.2%        |            | 40.7%                       | 80.4%                          |
|                        | Ex-smokers (1–3 years)                              | 1467         | 30.8%       | 15702.0    | 9.3%        | 5419.0     | 8.8%        | 4740.1     | 8.5%         | 4498.5     | 7.3%         | 3994.1     | 30.3%                       | 78.1%                          |
|                        | Ex-smokers ( $\geq 3$ years)                        | 14674        | 3.3%        | <0.001     | 0.6%        | <0.001     | 0.5%        | <0.001     | 0.5%         | <0.001     | 0.4%         | <0.001     | 19.2%                       | 59.8%                          |
| Smoking frequency      | Everyday smokers                                    | 8154         | 35.6%       | 0.89       | 9.3%        | 5.99       | 6.5%        | 18.58      | 5.2%         | 21.17      | 3.1%         | 40.30      | 25.9%                       | 48.9%                          |
|                        | Someday smokers                                     | 1851         | 36.8%       | 0.3        | 11.2%       | 0.0        | 9.3%        | <0.001     | 7.9%         | <0.001     | 6.2%         | <0.001     | 30.4%                       | 55.1%                          |

|                                      |                    |       |       |         |       |        |      |        |      |        |      |        |       |       |
|--------------------------------------|--------------------|-------|-------|---------|-------|--------|------|--------|------|--------|------|--------|-------|-------|
| Cigarette per day                    | 1–4                | 2011  | 33.2% |         | 10.1% |        | 8.6% |        | 7.5% |        | 5.9% |        | 30.6% | 57.8% |
|                                      | 5–14               | 3264  | 35.4% |         | 10.4% |        | 7.2% |        | 5.9% |        | 3.8% |        | 29.4% | 36.9% |
|                                      | 15–24              | 3746  | 37.1% | 11.6    | 8.8%  | 5.5    | 6.0% | 13.5   | 4.7% | 20.1   | 2.6% | 43.2   | 23.8% | 29.0% |
|                                      | 25+                | 984   | 38.3% | 0.0     | 9.5%  | 0.1    | 6.7% | 0.0    | 4.8% | 0.0    | 2.7% | <0.001 | 24.7% | 29.0% |
| First cigarette upon awakening       | ≤5 min             | 1708  | 39.5% |         | 9.5%  |        | 6.7% |        | 5.7% |        | 3.8% |        | 24.0% | 40.1% |
|                                      | 5–30 min           | 3405  | 36.4% | 16.8    | 9.8%  | 0.1    | 6.5% | 2.3    | 5.3% | 1.0    | 3.2% | 3.1    | 26.8% | 32.7% |
|                                      | >30 min            | 4892  | 34.1% | 0.0     | 9.6%  | 0.9    | 7.4% | 0.3    | 5.9% | 0.6    | 3.9% | 0.2    | 28.3% | 40.7% |
| Smokeless tobacco use§               | Yes                | 10637 | 23.3% | 3434.81 | 4.3%  | 48.82  | 2.4% | 5.98   | 1.9% | 2.46   | 0.9% | 1.21   | -     | -     |
|                                      | No                 | 59951 | 6.0%  | <0.001  | 2.2%  | <0.001 | 1.8% | 0.0    | 1.5% | 0.1    | 1.1% | 0.3    | -     | -     |
| State level cigarette tax ranking†   | Lowest quarter     | 14377 | 9.4%  |         | 2.8%  |        | 2.1% |        | 1.9% |        | 1.3% |        | 29.9% | 48.0% |
|                                      | Med-low quarter    | 21076 | 8.8%  |         | 2.3%  |        | 1.9% |        | 1.6% |        | 1.1% |        | 26.2% | 49.3% |
|                                      | Med-high quarter   | 17929 | 8.5%  | 24.3    | 2.2%  | 29.7   | 1.7% | 20.2   | 1.4% | 19.5   | 1.1% | 9.5    | 25.7% | 50.0% |
|                                      | Highest quarter    | 17206 | 7.9%  | <0.001  | 1.9%  | <0.001 | 1.5% | <0.001 | 1.3% | <0.001 | 1.0% | 0.024  | 24.1% | 51.8% |
| Tobacco control spending per capita† | Lowest quarter     | 18235 | 8.5%  |         | 2.5%  |        | 1.9% |        | 1.6% |        | 1.2% |        | 29.2% | 47.6% |
|                                      | Med-low quarter    | 17783 | 8.8%  |         | 2.3%  |        | 1.8% |        | 1.6% |        | 1.1% |        | 25.8% | 49.8% |
|                                      | Med-high quarter   | 22108 | 8.1%  | 19.7    | 2.2%  | 5.1    | 1.7% | 4.8    | 1.5% | 2.6    | 1.1% | 1.4    | 27.0% | 52.4% |
|                                      | Highest quarter    | 12462 | 9.5%  | <0.001  | 2.2%  | 0.164  | 1.7% | 0.184  | 1.4% | 0.451  | 1.0% | 0.696  | 22.7% | 48.1% |
| State level worksite smoking ban     | Highest level      | 44117 | 8.6%  | 0.2     | 2.2%  | 4.6    | 1.7% | 3.2    | 1.5% | 2.6    | 1.1% | 1.4    | 25.2% | 50.1% |
|                                      | Not highest level  | 26471 | 8.6%  | 0.687   | 2.4%  | 0.032  | 1.9% | 0.072  | 1.6% | 0.104  | 1.2% | 0.236  | 28.4% | 49.0% |
| State level worksite e-cigarette ban | Highest level      | 3277  | 8.0%  | 1.6     | 2.2%  | 0.2    | 1.6% | 1.0    | 1.3% | 0.9    | 1.1% | 0.1    | 27.1% | 49.3% |
|                                      | Not highest level  | 67311 | 8.6%  | 0.200   | 2.3%  | 0.674  | 1.8% | 0.320  | 1.5% | 0.351  | 1.1% | 0.735  | 26.4% | 49.7% |
| State level e-cigarette tax          | yes                | 1379  | 10.2% | 4.3     | 2.7%  | 1.1    | 2.3% | 2.3    | 2.2% | 4.7    | 1.7% | 4.7    | 26.4% | 64.9% |
|                                      | no                 | 69209 | 8.6%  | 0.039   | 2.3%  | 0.303  | 1.8% | 0.126  | 1.5% | 0.031  | 1.1% | 0.030  | 26.4% | 49.3% |
| Census division                      | East North Central | 8062  | 9.7%  |         | 2.5%  |        | 2.0% |        | 1.7% |        | 1.2% |        | 25.7% | 49.3% |
|                                      | East South Central | 4758  | 9.4%  |         | 2.8%  |        | 2.4% |        | 2.0% |        | 1.5% |        | 30.1% | 53.3% |
|                                      | Middle Atlantic    | 5796  | 7.0%  |         | 1.7%  |        | 1.3% |        | 1.1% |        | 0.8% |        | 24.9% | 48.5% |
|                                      | Mountain           | 8554  | 9.5%  |         | 2.8%  |        | 2.2% |        | 1.9% |        | 1.4% |        | 29.7% | 50.8% |
|                                      | New England        | 6428  | 6.9%  |         | 1.6%  |        | 1.2% |        | 1.0% |        | 0.8% |        | 22.5% | 49.0% |
|                                      | Pacific            | 9481  | 8.1%  |         | 2.0%  |        | 1.4% |        | 1.2% |        | 0.9% |        | 24.3% | 46.8% |
|                                      | South Atlantic     | 13021 | 7.6%  |         | 2.0%  |        | 1.6% |        | 1.4% |        | 1.0% |        | 26.3% | 48.7% |
|                                      | West North Central | 7488  | 10.6% | 127.5   | 2.6%  | 58.9   | 2.0% | 57.7   | 1.8% | 48.2   | 1.3% | 37.8   | 24.2% | 49.5% |
|                                      | West South Central | 7000  | 9.0%  | <0.001  | 2.7%  | <0.001 | 2.2% | <0.001 | 1.8% | <0.001 | 1.4% | <0.001 | 29.8% | 51.3% |

§ Sample size for smokeless tobacco use was in terms of ever use. For ever use, current use, 5 more days, 10 more days and 20 more days in last month, the number of respondents who use SLT with the same measure of e-cigarette are 10637, 2531, 2290, 2156, and 1855. The prevalence of e-cigarette use by five measures was estimated among SLT users who were categorized by the same measure; † Data for state level cigarette tax ranking are in Jan 2015 and tobacco control spending per capita are in 2015.

**Supplementary Table S1f. Ever, Current (at Least Once in the Last 30 Days), 5 or More, 10 or More, 20 or More of the Last 30 Days Measures of E-cigarette Use, Total Females, TUS-CPS, 2014/5**

| Variable               | Categories                                          | Sample Size | Ever use | $\chi^2$ p | Current use | $\chi^2$ p | 5 more days | $\chi^2$ p | 10 more days | $\chi^2$ p | 20 more days | $\chi^2$ p | Ratio (current to ever use) | Ratio (20 days to current use) |
|------------------------|-----------------------------------------------------|-------------|----------|------------|-------------|------------|-------------|------------|--------------|------------|--------------|------------|-----------------------------|--------------------------------|
| Overall                |                                                     | 88038       | 7.0%     |            | 1.9%        |            | 1.4%        |            | 1.1%         |            | 0.8%         |            | 27.6%                       | 41.3%                          |
| Age                    | 18–24                                               | 5662        | 11.9%    |            | 2.7%        |            | 1.9%        |            | 1.5%         |            | 0.8%         |            | 22.7%                       | 28.1%                          |
|                        | 25–34                                               | 14232       | 10.6%    |            | 2.4%        |            | 1.7%        |            | 1.3%         |            | 1.0%         |            | 22.5%                       | 40.7%                          |
|                        | 35–44                                               | 14324       | 8.6%     |            | 2.3%        |            | 1.7%        |            | 1.3%         |            | 0.9%         |            | 27.2%                       | 36.9%                          |
|                        | 45–64                                               | 31818       | 7.2%     | 1319.2     | 2.2%        | 215.1      | 1.6%        | 140.5      | 1.4%         | 105.1      | 1.0%         | 77.8       | 31.0%                       | 45.2%                          |
|                        | 65+                                                 | 22002       | 2.2%     | <0.001     | 0.8%        | <0.001     | 0.6%        | <0.001     | 0.5%         | <0.001     | 0.4%         | <0.001     | 35.2%                       | 46.2%                          |
| Race                   | White                                               | 72226       | 7.5%     |            | 2.1%        |            | 1.5%        |            | 1.2%         |            | 0.9%         |            | 28.1%                       | 41.6%                          |
|                        | Black                                               | 9863        | 4.1%     |            | 0.9%        |            | 0.6%        |            | 0.4%         |            | 0.3%         |            | 22.2%                       | 33.7%                          |
|                        | Asian                                               | 3340        | 2.3%     | 363.9      | 0.5%        | 125.0      | 0.4%        | 96.4       | 0.4%         | 83.6       | 0.2%         | 61.4       | 21.1%                       | 43.8%                          |
|                        | Other Races                                         | 2609        | 11.8%    | <0.001     | 3.2%        | <0.001     | 2.2%        | <0.001     | 1.9%         | <0.001     | 1.4%         | <0.001     | 26.9%                       | 43.4%                          |
| Hispanic               | Hispanic                                            | 9349        | 4.0%     | 152.0      | 0.9%        | 57.5       | 0.6%        | 47.8       | 0.5%         | 37.2       | 0.4%         | 24.0       | 23.2%                       | 40.7%                          |
|                        | Non-Hispanic                                        | 78689       | 7.4%     | <0.001     | 2.1%        | <0.001     | 1.5%        | <0.001     | 1.2%         | <0.001     | 0.9%         | <0.001     | 27.9%                       | 41.3%                          |
| Education              | Less than 12 years                                  | 8807        | 7.5%     |            | 2.2%        |            | 1.7%        |            | 1.2%         |            | 0.9%         |            | 30.0%                       | 38.4%                          |
|                        | High school degree                                  | 24424       | 8.3%     |            | 2.5%        |            | 1.8%        |            | 1.5%         |            | 1.0%         |            | 29.5%                       | 42.3%                          |
|                        | Associate degree                                    | 26474       | 9.4%     | 789.6      | 2.6%        | 309.3      | 1.9%        | 235.7      | 1.5%         | 197.4      | 1.1%         | 145.1      | 28.1%                       | 42.4%                          |
|                        | College degree or higher                            | 28333       | 3.6%     | <0.001     | 0.8%        | <0.001     | 0.5%        | <0.001     | 0.4%         | <0.001     | 0.3%         | <0.001     | 21.2%                       | 37.3%                          |
| Family income          | \$0–\$19,999                                        | 17124       | 9.6%     |            | 2.8%        |            | 2.1%        |            | 1.7%         |            | 1.2%         |            | 29.6%                       | 40.4%                          |
|                        | \$20,000–\$39,999                                   | 21012       | 7.8%     |            | 2.3%        |            | 1.6%        |            | 1.3%         |            | 0.9%         |            | 29.0%                       | 38.5%                          |
|                        | \$40,000–\$74,999                                   | 23405       | 6.9%     | 383.6      | 1.9%        | 166.6      | 1.3%        | 118.3      | 1.0%         | 89.2       | 0.8%         | 51.7       | 27.0%                       | 42.5%                          |
|                        | \$75,000 or more                                    | 26497       | 4.9%     | <0.001     | 1.2%        | <0.001     | 0.9%        | <0.001     | 0.7%         | <0.001     | 0.5%         | <0.001     | 24.2%                       | 45.0%                          |
| Marital status         | Never Married                                       | 17522       | 10.0%    |            | 2.3%        |            | 1.6%        |            | 1.2%         |            | 0.8%         |            | 23.1%                       | 34.5%                          |
|                        | Married-Spouse Present                              | 43751       | 5.4%     | 447.6      | 1.5%        | 92.6       | 1.1%        | 82.9       | 0.9%         | 68.2       | 0.6%         | 49.9       | 27.8%                       | 41.3%                          |
|                        | Married-Spouse Absent or Widowed/Divorced/Separated | 26765       | 7.8%     | <0.001     | 2.4%        | <0.001     | 1.8%        | <0.001     | 1.5%         | <0.001     | 1.1%         | <0.001     | 31.1%                       | 45.5%                          |
| Employment status      | Employed                                            | 47624       | 7.6%     | 53.9       | 1.9%        | 0.8        | 1.4%        | 0.0        | 1.2%         | 0.5        | 0.8%         | 0.5        | 25.0%                       | 43.1%                          |
|                        | Not in labor force or unemployed                    | 40414       | 6.4%     | <0.001     | 2.0%        | 0.363      | 1.4%        | 0.870      | 1.1%         | 0.459      | 0.8%         | 0.491      | 31.3%                       | 39.2%                          |
| Metropolitan status    | MSA                                                 | 67960       | 6.7%     | 65.2       | 1.8%        | 23.2       | 1.3%        | 15.1       | 1.1%         | 7.5        | 0.8%         | 3.9        | 27.3%                       | 42.2%                          |
|                        | Non-MSA                                             | 20078       | 8.3%     | <0.001     | 2.4%        | <0.001     | 1.7%        | <0.001     | 1.3%         | 0.006      | 0.9%         | 0.048      | 28.3%                       | 38.7%                          |
| Indoor workers         | Yes                                                 | 50234       | 6.6%     | 33.4       | 2.0%        | 1.1        | 1.4%        | 0.0        | 1.1%         | 0.2        | 0.8%         | 0.0        | 30.1%                       | 40.6%                          |
|                        | No                                                  | 37804       | 7.6%     | <0.001     | 1.9%        | 0.284      | 1.4%        | 0.825      | 1.2%         | 0.652      | 0.8%         | 0.869      | 24.8%                       | 42.2%                          |
| Current smoking status | Current smokers                                     | 10345       | 39.4%    |            | 11.5%       |            | 7.7%        |            | 5.8%         |            | 3.5%         |            | 29.0%                       | 30.9%                          |
|                        | Never smokers                                       | 61801       | 1.0%     |            | 0.1%        |            | 0.1%        |            | 0.1%         |            | 0.0%         |            | 13.8%                       | 29.2%                          |
|                        | Ex-smokers (<1 year)                                | 1563        | 43.3%    |            | 14.9%       |            | 13.4%       |            | 12.7%        |            | 11.1%        |            | 34.4%                       | 74.7%                          |
|                        | Ex-smokers (1–3 years)                              | 1425        | 29.6%    | 24573.8    | 10.3%       | 8016.2     | 9.3%        | 6067.8     | 8.6%         | 5306.8     | 7.5%         | 4373.1     | 34.8%                       | 72.8%                          |
|                        | Ex-smokers (≥3 years)                               | 12904       | 2.9%     | <0.001     | 0.4%        | <0.001     | 0.3%        | <0.001     | 0.3%         | <0.001     | 0.3%         | <0.001     | 15.2%                       | 57.9%                          |
| Smoking frequency      | Everyday smokers                                    | 8473        | 40.0%    | 5.60       | 10.9%       | 14.55      | 7.1%        | 20.79      | 5.3%         | 20.07      | 3.1%         | 25.84      | 26.3%                       | 41.6%                          |
|                        | Someday smokers                                     | 1872        | 37.0%    | 0.0        | 14.0%       | 0.0        | 10.2%       | <0.001     | 8.0%         | <0.001     | 5.5%         | <0.001     | 37.8%                       | 39.3%                          |

|                                      |                    |       |       |         |       |        |      |        |      |        |      |        |       |       |
|--------------------------------------|--------------------|-------|-------|---------|-------|--------|------|--------|------|--------|------|--------|-------|-------|
| Cigarette per day                    | 1–4                | 2173  | 35.5% |         | 13.0% |        | 9.2% |        | 7.1% |        | 4.9% |        | 36.6% | 37.6% |
|                                      | 5–14               | 4393  | 38.9% |         | 10.4% |        | 7.5% |        | 5.9% |        | 3.5% |        | 26.8% | 33.6% |
|                                      | 15–24              | 3243  | 42.2% | 28.8    | 11.5% | 12.0   | 6.9% | 10.1   | 5.0% | 10.8   | 2.7% | 18.0   | 27.2% | 23.7% |
|                                      | 25+                | 536   | 43.7% | <0.001  | 13.6% | 0.0    | 7.5% | 0.0    | 5.6% | 0.0    | 3.4% | 0.0    | 31.2% | 24.7% |
| First cigarette upon awakening       | ≤5 min             | 1793  | 45.5% |         | 13.5% |        | 8.4% |        | 6.6% |        | 4.3% |        | 29.7% | 31.8% |
|                                      | 5–30 min           | 3405  | 41.0% | 52.1    | 11.4% | 9.7    | 7.4% | 1.8    | 5.7% | 2.7    | 3.1% | 4.6    | 27.8% | 27.6% |
|                                      | >30 min            | 5147  | 36.3% | <0.001  | 10.8% | 0.0    | 7.6% | 0.4    | 5.6% | 0.3    | 3.5% | 0.1    | 29.7% | 32.8% |
| Smokeless tobacco use§               | Yes                | 1402  | 40.2% | 2386.96 | 8.8%  | 30.88  | 6.5% | 20.41  | 4.3% | 8.48   | 1.3% | 0.23   | -     | -     |
|                                      | No                 | 86636 | 6.5%  | <0.001  | 1.9%  | <0.001 | 1.4% | <0.001 | 1.1% | 0.0    | 0.8% | 0.6    | -     | -     |
| State cigarette tax ranking†         | Lowest quarter     | 18613 | 8.0%  |         | 2.5%  |        | 1.8% |        | 1.5% |        | 1.1% |        | 31.5% | 42.0% |
|                                      | Med-low quarter    | 25948 | 7.0%  |         | 1.9%  |        | 1.5% |        | 1.2% |        | 0.9% |        | 27.6% | 46.8% |
|                                      | Med-high quarter   | 22165 | 7.2%  | 54.5    | 1.9%  | 52.7   | 1.3% | 41.7   | 1.0% | 33.4   | 0.6% | 34.7   | 26.1% | 34.1% |
|                                      | Highest quarter    | 21312 | 6.2%  | <0.001  | 1.5%  | <0.001 | 1.1% | <0.001 | 0.9% | <0.001 | 0.6% | <0.001 | 25.0% | 40.9% |
| Tobacco control spending per capita† | Lowest quarter     | 22725 | 7.3%  |         | 2.2%  |        | 1.6% |        | 1.3% |        | 0.9% |        | 30.1% | 42.1% |
|                                      | Med-low quarter    | 22645 | 7.4%  |         | 2.0%  |        | 1.5% |        | 1.2% |        | 0.9% |        | 27.5% | 43.0% |
|                                      | Med-high quarter   | 27398 | 6.0%  | 71.5    | 1.6%  | 26.6   | 1.1% | 28.9   | 0.9% | 26.5   | 0.6% | 15.8   | 26.6% | 39.5% |
|                                      | Highest quarter    | 15270 | 8.0%  | <0.001  | 2.1%  | <0.001 | 1.5% | <0.001 | 1.2% | <0.001 | 0.8% | 0.001  | 25.7% | 39.8% |
| State level worksite smoking ban     | Highest level      | 54635 | 7.0%  | 0.0     | 1.9%  | 5.1    | 1.3% | 6.6    | 1.1% | 7.2    | 0.7% | 10.8   | 26.5% | 38.9% |
|                                      | Not highest level  | 33403 | 7.1%  | 0.849   | 2.1%  | 0.024  | 1.5% | 0.010  | 1.3% | 0.007  | 0.9% | 0.001  | 29.4% | 44.7% |
| State level worksite e-cigarette ban | Highest level      | 3852  | 5.6%  | 13.6    | 1.5%  | 4.5    | 1.0% | 3.9    | 0.9% | 2.8    | 0.5% | 3.3    | 26.6% | 36.8% |
|                                      | Not highest level  | 84186 | 7.1%  | <0.001  | 2.0%  | 0.033  | 1.4% | 0.048  | 1.1% | 0.096  | 0.8% | 0.068  | 27.6% | 41.4% |
| State level e-cigarette tax          | yes                | 1624  | 7.7%  | 1.1     | 1.8%  | 0.2    | 1.3% | 0.1    | 1.0% | 0.1    | 1.0% | 0.7    | 23.2% | 55.2% |
|                                      | no                 | 86414 | 7.0%  | 0.297   | 1.9%  | 0.642  | 1.4% | 0.699  | 1.1% | 0.736  | 0.8% | 0.403  | 27.7% | 41.0% |
| Census division                      | East North Central | 10026 | 8.0%  |         | 2.1%  |        | 1.6% |        | 1.2% |        | 0.8% |        | 26.5% | 39.9% |
|                                      | East South Central | 6168  | 8.4%  |         | 2.6%  |        | 2.0% |        | 1.8% |        | 1.2% |        | 30.9% | 46.0% |
|                                      | Middle Atlantic    | 7430  | 5.9%  |         | 1.5%  |        | 1.0% |        | 0.9% |        | 0.5% |        | 25.4% | 36.0% |
|                                      | Mountain           | 10214 | 8.1%  |         | 2.4%  |        | 1.7% |        | 1.4% |        | 1.0% |        | 29.6% | 41.8% |
|                                      | New England        | 7821  | 5.8%  |         | 1.6%  |        | 1.0% |        | 0.9% |        | 0.6% |        | 27.8% | 38.6% |
|                                      | Pacific            | 11521 | 5.8%  |         | 1.3%  |        | 1.0% |        | 0.8% |        | 0.6% |        | 22.8% | 45.8% |
|                                      | South Atlantic     | 16760 | 6.1%  |         | 1.8%  |        | 1.2% |        | 1.0% |        | 0.7% |        | 29.5% | 41.5% |
|                                      | West North Central | 9041  | 8.3%  | 167.1   | 2.3%  | 71.9   | 1.6% | 63.6   | 1.2% | 55.0   | 0.8% | 38.0   | 27.7% | 34.3% |
|                                      | West South Central | 9057  | 8.0%  | <0.001  | 2.2%  | <0.001 | 1.7% | <0.001 | 1.3% | <0.001 | 1.0% | <0.001 | 27.0% | 46.4% |

§ Sample size for smokeless tobacco use was in terms of ever use. For ever use, current use, 5 more days, 10 more days and 20 more days in last month, the number of respondents who use SLT with the same measure of e-cigarette are 1402, 125, 107, 92, and 78. The prevalence of e-cigarette use by five measures was estimated among SLT users who were categorized by the same measure; † Data for state level cigarette tax ranking are in Jan 2015 and tobacco control spending per capita are in 2015.

**Supplementary Table S2a. Logistic Regression Equations, Male Smokers 12 Months Ago, Ever, Current (at Least Once in the Last 30 Days), 5 or More, 10 or More, 20 or More of the Last 30 Days Measures of E-cigarette Use, TUS-CPS, 2014/5**

| Variable                                                | Category                                            | Ever use |           |           | Current use |      |           | >5 days |      |           | >10 days |      |           | >20 days |      |           |
|---------------------------------------------------------|-----------------------------------------------------|----------|-----------|-----------|-------------|------|-----------|---------|------|-----------|----------|------|-----------|----------|------|-----------|
|                                                         |                                                     | OR       | Prob<br>Δ | 95% CI    | OR          | Prob | 95% CI    | OR      | Prob | 95% CI    | OR       | Prob | 95% CI    | OR       | Prob | 95% CI    |
| Intercept                                               |                                                     | 0.18     | ***       | 0.12–0.27 | 0.06        | ***  | 0.03–0.11 | 0.05    | ***  | 0.02–0.09 | 0.03     | ***  | 0.02–0.07 | 0.03     | ***  | 0.01–0.06 |
| Age (ref: 35–44)                                        | 18–24                                               | 2.02     | ***       | 1.61–2.52 | 1.24        |      | 0.91–1.70 | 1.24    |      | 0.88–1.75 | 1.30     |      | 0.90–1.87 | 1.43     | *    | 0.95–2.15 |
|                                                         | 22–25                                               | 1.53     | ***       | 1.30–1.79 | 1.19        |      | 0.95–1.50 | 1.03    |      | 0.80–1.33 | 0.99     |      | 0.75–1.30 | 1.09     |      | 0.79–1.49 |
|                                                         | 45–64                                               | 0.67     | ***       | 0.58–0.77 | 0.72        | ***  | 0.58–0.88 | 0.66    | ***  | 0.53–0.83 | 0.66     | ***  | 0.52–0.85 | 0.64     | ***  | 0.48–0.85 |
|                                                         | 65+                                                 | 0.44     | ***       | 0.36–0.55 | 0.48        | ***  | 0.34–0.67 | 0.50    | ***  | 0.34–0.72 | 0.51     | ***  | 0.34–0.75 | 0.49     | ***  | 0.31–0.79 |
| Race (ref: White)                                       | Asian                                               | 0.68     | **        | 0.49–0.95 | 0.42        | ***  | 0.23–0.76 | 0.44    | **   | 0.22–0.86 | 0.52     | *    | 0.26–1.04 | 0.29     | ***  | 0.11–0.72 |
|                                                         | Black                                               | 0.81     | **        | 0.67–0.98 | 0.64        | ***  | 0.46–0.89 | 0.55    | ***  | 0.36–0.83 | 0.58     | **   | 0.37–0.91 | 0.63     | *    | 0.37–1.07 |
|                                                         | Other races                                         | 1.26     |           | 0.94–1.68 | 1.64        | **   | 1.10–2.44 | 1.27    |      | 0.78–2.05 | 1.22     |      | 0.76–1.98 | 1.17     |      | 0.67–2.07 |
| Hispanic (ref: Non-Hispanic)                            | Hispanic                                            | 0.76     | ***       | 0.61–0.94 | 0.57        | ***  | 0.41–0.80 | 0.45    | ***  | 0.30–0.69 | 0.44     | ***  | 0.28–0.68 | 0.40     | ***  | 0.24–0.67 |
| Education (ref: Less than 12 years)                     | High school degree                                  | 1.16     | *         | 0.99–1.37 | 1.28        | *    | 0.99–1.67 | 1.28    |      | 0.94–1.73 | 1.41     | **   | 1.01–1.96 | 1.57     | **   | 1.07–2.31 |
|                                                         | Associate degree                                    | 1.60     | ***       | 1.34–1.89 | 1.79        | ***  | 1.36–2.35 | 1.67    | ***  | 1.22–2.29 | 1.70     | ***  | 1.20–2.41 | 1.61     | **   | 1.07–2.43 |
|                                                         | College degree or higher                            | 1.77     | ***       | 1.43–2.19 | 1.65        | ***  | 1.18–2.31 | 1.45    | *    | 0.98–2.12 | 1.53     | **   | 1.01–2.32 | 1.33     |      | 0.81–2.19 |
|                                                         |                                                     |          |           |           |             |      |           |         |      |           |          |      |           |          |      |           |
| Family income (ref: \$0–\$19,999)                       | \$20,000–\$39,999                                   | 1.02     |           | 0.88–1.19 | 1.09        |      | 0.87–1.37 | 1.09    |      | 0.84–1.41 | 1.13     |      | 0.86–1.49 | 1.07     |      | 0.78–1.46 |
|                                                         | \$40,000–\$74,999                                   | 0.96     |           | 0.82–1.13 | 0.93        |      | 0.72–1.19 | 0.91    |      | 0.69–1.21 | 0.98     |      | 0.72–1.33 | 0.92     |      | 0.64–1.32 |
|                                                         | \$75,000 or more                                    | 1.22     | **        | 1.01–1.46 | 1.19        |      | 0.90–1.58 | 1.18    |      | 0.86–1.61 | 1.27     |      | 0.91–1.78 | 1.19     |      | 0.80–1.77 |
| Marital status (ref: Married-Spouse Present)            | Never Married                                       | 0.98     |           | 0.85–1.13 | 0.89        |      | 0.73–1.08 | 0.94    |      | 0.75–1.18 | 0.89     |      | 0.70–1.14 | 0.84     |      | 0.64–1.11 |
|                                                         | Married-Spouse Absent or Widowed/Divorced/Separated | 1.05     |           | 0.92–1.20 | 0.92        |      | 0.76–1.12 | 0.95    |      | 0.77–1.18 | 0.99     |      | 0.78–1.25 | 0.99     |      | 0.75–1.30 |
| Employment status (ref: Employed)                       | Not in labor force or unemployed                    | 0.96     |           | 0.83–1.11 | 1.14        |      | 0.91–1.43 | 1.05    |      | 0.81–1.34 | 1.07     |      | 0.81–1.40 | 1.04     |      | 0.75–1.44 |
| Metropolitan status (ref: Non-MSA)                      | MSA                                                 | 1.19     | ***       | 1.05–1.36 | 1.15        |      | 0.94–1.40 | 1.13    |      | 0.90–1.41 | 1.01     |      | 0.80–1.29 | 0.99     |      | 0.75–1.31 |
| Indoor workers (ref: No)                                | Yes                                                 | 1.04     |           | 0.91–1.18 | 1.33        | ***  | 1.10–1.61 | 1.26    | **   | 1.01–1.56 | 1.27     | **   | 1.01–1.60 | 1.25     |      | 0.96–1.64 |
| Current smoking status (ref: Current Smokers)           | Ex-Smokers (<1 year)                                | 1.46     | ***       | 1.23–1.72 | 2.34        | ***  | 1.90–2.89 | 3.20    | ***  | 2.57–3.98 | 4.16     | ***  | 3.33–5.21 | 5.82     | ***  | 4.53–7.48 |
| Smoking frequency 12 months ago (ref: Everyday smokers) | Someday smokers                                     | 1.31     | **        | 1.06–1.62 | 1.36        | *    | 0.98–1.89 | 1.33    |      | 0.90–1.96 | 1.43     | *    | 0.96–2.14 | 1.19     |      | 0.76–1.85 |
| Cigarette per day 12 months ago (ref: 1–4)              | 5–14                                                | 1.63     | ***       | 1.31–2.02 | 1.41        | *    | 1.00–2.00 | 1.29    |      | 0.86–1.93 | 1.46     | *    | 0.96–2.23 | 1.26     |      | 0.79–1.99 |
|                                                         | 15–24                                               | 1.83     | ***       | 1.44–2.32 | 1.84        | ***  | 1.28–2.65 | 1.66    | **   | 1.09–2.52 | 1.84     | ***  | 1.18–2.88 | 1.67     | **   | 1.03–2.73 |
|                                                         | 25+                                                 | 2.42     | ***       | 1.83–3.20 | 2.69        | ***  | 1.77–4.07 | 2.62    | ***  | 1.63–4.21 | 2.75     | ***  | 1.66–4.56 | 2.51     | ***  | 1.43–4.41 |

|                                                               |                    |      |     |           |      |           |           |           |           |           |           |           |           |           |    |           |
|---------------------------------------------------------------|--------------------|------|-----|-----------|------|-----------|-----------|-----------|-----------|-----------|-----------|-----------|-----------|-----------|----|-----------|
| First cigarette upon awakening § (ref: >30 min)               | ≤5 min             | 1.22 | **  | 1.03–1.43 | 0.98 | 0.77–1.24 | 0.87      | 0.66–1.14 | 0.95      | 0.71–1.27 | 1.05      | 0.74–1.47 |           |           |    |           |
|                                                               | 5–30 min           | 1.17 | **  | 1.03–1.33 | 1.02 | 0.84–1.23 | 0.90      | 0.72–1.12 | 0.91      | 0.72–1.15 | 0.95      | 0.72–1.26 |           |           |    |           |
| Smokeless tobacco use † (ref: No)                             | Yes                | 3.79 | *** | 3.35–4.27 | 1.47 | **        | 1.03–2.10 | 0.98      | 0.57–1.68 | 0.69      | 0.36–1.32 | 0.49      | *         | 0.22–1.09 |    |           |
| State level cigarette tax ranking ‡ (ref: Lowest quarter)     | Med-low quarter    | 1.08 |     | 0.89–1.31 | 0.88 |           | 0.67–1.17 | 1.02      |           | 0.75–1.40 | 1.06      |           | 0.75–1.49 | 0.98      |    | 0.65–1.47 |
|                                                               | Med-high quarter   | 1.17 |     | 0.96–1.44 | 0.86 |           | 0.63–1.16 | 0.88      |           | 0.62–1.24 | 0.85      |           | 0.59–1.22 | 0.98      |    | 0.64–1.50 |
|                                                               | Highest quarter    | 1.03 |     | 0.80–1.33 | 0.83 |           | 0.56–1.23 | 0.98      |           | 0.62–1.56 | 0.88      |           | 0.54–1.44 | 1.01      |    | 0.57–1.78 |
| Tobacco control spending per capita ‡ (ref: Lowest quarter)   | Med-low quarter    | 1.01 |     | 0.86–1.19 | 0.96 |           | 0.76–1.23 | 0.98      |           | 0.74–1.29 | 0.95      |           | 0.71–1.27 | 1.06      |    | 0.75–1.50 |
|                                                               | Med-high quarter   | 1.02 |     | 0.86–1.21 | 0.98 |           | 0.77–1.25 | 1.01      |           | 0.77–1.34 | 1.09      |           | 0.81–1.47 | 1.27      |    | 0.89–1.81 |
|                                                               | Highest quarter    | 0.83 | **  | 0.69–1.00 | 0.67 | ***       | 0.51–0.88 | 0.68      | **        | 0.50–0.93 | 0.69      | **        | 0.49–0.96 | 0.76      |    | 0.50–1.13 |
| State level worksite smoking ban (ref: Not highest level)     | Highest level      | 1.06 |     | 0.90–1.25 | 1.02 |           | 0.80–1.30 | 0.99      |           | 0.75–1.30 | 1.02      |           | 0.75–1.37 | 1.04      |    | 0.73–1.50 |
| State level worksite e-cigarette ban (ref: Not highest level) | Highest level      | 0.81 |     | 0.58–1.12 | 1.19 |           | 0.76–1.87 | 1.17      |           | 0.69–1.99 | 1.42      |           | 0.81–2.48 | 1.09      |    | 0.53–2.24 |
| State level e-cigarette tax (ref: No)                         | Yes                | 1.12 |     | 0.73–1.71 | 0.93 |           | 0.49–1.75 | 0.98      |           | 0.49–1.99 | 1.11      |           | 0.53–2.29 | 0.97      |    | 0.42–2.23 |
| Survey time (ref: July 2014)                                  | Jan 2015           | 0.97 |     | 0.85–1.10 | 0.96 |           | 0.80–1.15 | 1.01      |           | 0.83–1.23 | 1.00      |           | 0.80–1.24 | 0.95      |    | 0.74–1.22 |
|                                                               | May 2015           | 0.95 |     | 0.84–1.08 | 0.78 | **        | 0.64–0.94 | 0.79      | **        | 0.63–0.98 | 0.76      | **        | 0.60–0.97 | 0.71      | ** | 0.53–0.94 |
| Census division (ref: Pacific)                                | East North Central | 0.85 |     | 0.66–1.09 | 0.81 |           | 0.56–1.17 | 0.94      |           | 0.61–1.44 | 0.82      |           | 0.51–1.32 | 0.75      |    | 0.43–1.31 |
|                                                               | East South Central | 0.77 | **  | 0.60–1.00 | 0.83 |           | 0.57–1.21 | 1.05      |           | 0.69–1.60 | 0.95      |           | 0.61–1.48 | 0.88      |    | 0.51–1.49 |
|                                                               | Middle Atlantic    | 0.82 |     | 0.63–1.07 | 0.90 |           | 0.59–1.35 | 1.06      |           | 0.66–1.70 | 0.97      |           | 0.58–1.63 | 0.87      |    | 0.48–1.59 |
|                                                               | Mountain           | 1.00 |     | 0.78–1.30 | 1.39 | *         | 0.96–2.02 | 1.42      |           | 0.92–2.19 | 1.27      |           | 0.80–2.03 | 1.23      |    | 0.71–2.15 |
|                                                               | New England        | 0.87 |     | 0.64–1.17 | 0.82 |           | 0.52–1.28 | 0.85      |           | 0.51–1.44 | 0.88      |           | 0.50–1.55 | 0.70      |    | 0.36–1.36 |
|                                                               | South Atlantic     | 0.87 |     | 0.70–1.10 | 0.82 |           | 0.58–1.16 | 0.94      |           | 0.63–1.40 | 0.89      |           | 0.58–1.36 | 0.88      |    | 0.53–1.45 |
|                                                               | West North Central | 0.88 |     | 0.67–1.16 | 0.91 |           | 0.62–1.35 | 1.10      |           | 0.70–1.72 | 1.03      |           | 0.63–1.67 | 0.98      |    | 0.55–1.74 |
|                                                               | West South Central | 0.67 | *** | 0.53–0.86 | 0.94 |           | 0.65–1.34 | 1.27      |           | 0.84–1.92 | 1.15      |           | 0.73–1.80 | 1.04      |    | 0.61–1.77 |

Δ Odds ratio and significance level of *p*-value: "\*\*\*\*" < 0.01; 0.01 < "\*\*\*" < 0.05; 0.05 < "\*\*" <= 0.1; § The time reported for current smokers was their current habit while for quitters in last year was their habit one year ago; † Smokeless tobacco use and e-cigarette use were using the same measure in each model; ‡ Data for state level cigarette tax ranking are in Jan 2015 and tobacco control spending per capita are in 2015.

**Supplementary Table S2b. Logistic Regression Equations, Female Smokers 12 Months Ago, Ever, Current (at Least Once in the Last 30 Days), 5 or More, 10 or More, 20 or More of the Last 30 Days Measures of E-cigarette Use, TUS-CPS, 2014/5**

| Variable                                                | Category                                            | Ever use |       |           | Current use |      |           | >5 days |      |           | >10 days |      |           | >20 days |      |           |
|---------------------------------------------------------|-----------------------------------------------------|----------|-------|-----------|-------------|------|-----------|---------|------|-----------|----------|------|-----------|----------|------|-----------|
|                                                         |                                                     | OR       | ProbΔ | 95% CI    | OR          | Prob | 95% CI    | OR      | Prob | 95% CI    | OR       | Prob | 95% CI    | OR       | Prob | 95% CI    |
| Intercept                                               |                                                     | 0.48     | ***   | 0.32–0.71 | 0.08        | ***  | 0.04–0.15 | 0.04    | ***  | 0.02–0.08 | 0.02     | ***  | 0.01–0.05 | 0.02     | ***  | 0.01–0.04 |
| Age (ref: 35–44)                                        | 18–24                                               | 1.79     | ***   | 1.41–2.26 | 1.47        | **   | 1.07–2.02 | 1.54    | **   | 1.07–2.22 | 1.64     | **   | 1.08–2.48 | 1.18     |      | 0.69–2.02 |
|                                                         | 22–25                                               | 1.17     | **    | 1.01–1.37 | 1.03        |      | 0.82–1.29 | 1.07    |      | 0.82–1.40 | 1.07     |      | 0.79–1.45 | 1.15     |      | 0.80–1.64 |
|                                                         | 45–64                                               | 0.80     | ***   | 0.70–0.91 | 0.93        |      | 0.77–1.11 | 0.94    |      | 0.76–1.16 | 1.04     |      | 0.82–1.33 | 1.13     |      | 0.84–1.50 |
|                                                         | 65+                                                 | 0.47     | ***   | 0.39–0.57 | 0.67        | ***  | 0.51–0.88 | 0.76    | *    | 0.56–1.04 | 0.82     |      | 0.58–1.16 | 0.85     |      | 0.56–1.28 |
| Race (ref: White)                                       | Asian                                               | 0.72     |       | 0.45–1.15 | 1.07        |      | 0.50–2.32 | 1.43    |      | 0.62–3.28 | 1.80     |      | 0.77–4.18 | 1.42     |      | 0.43–4.69 |
|                                                         | Black                                               | 0.52     | ***   | 0.43–0.63 | 0.47        | ***  | 0.34–0.64 | 0.39    | ***  | 0.25–0.58 | 0.36     | ***  | 0.23–0.56 | 0.36     | ***  | 0.21–0.62 |
|                                                         | Other races                                         | 1.28     | *     | 0.99–1.66 | 1.29        |      | 0.90–1.86 | 1.24    |      | 0.82–1.87 | 1.34     |      | 0.86–2.08 | 1.48     |      | 0.90–2.45 |
| Hispanic (ref: Non-Hispanic)                            | Hispanic                                            | 0.70     | ***   | 0.55–0.88 | 0.68        | **   | 0.47–0.99 | 0.65    | *    | 0.41–1.03 | 0.63     | *    | 0.39–1.01 | 0.58     | *    | 0.33–1.02 |
| Education (ref: Less than 12 years)                     | High school degree                                  | 1.20     | **    | 1.02–1.40 | 1.18        |      | 0.93–1.49 | 1.08    |      | 0.82–1.42 | 1.30     |      | 0.95–1.79 | 1.18     |      | 0.81–1.72 |
|                                                         | Associate degree                                    | 1.43     | ***   | 1.22–1.69 | 1.27        | **   | 1.00–1.61 | 1.16    |      | 0.88–1.52 | 1.34     | *    | 0.97–1.84 | 1.31     |      | 0.89–1.93 |
|                                                         | College degree or higher                            | 1.36     | ***   | 1.11–1.67 | 1.24        |      | 0.91–1.69 | 1.00    |      | 0.70–1.44 | 1.13     |      | 0.75–1.72 | 1.21     |      | 0.74–1.99 |
| Family income (ref: \$0–\$19,999)                       | \$20,000–\$39,999                                   | 1.02     |       | 0.89–1.17 | 0.89        |      | 0.73–1.09 | 0.86    |      | 0.68–1.09 | 0.83     |      | 0.64–1.07 | 0.86     |      | 0.62–1.18 |
|                                                         | \$40,000–\$74,999                                   | 1.09     |       | 0.94–1.26 | 0.88        |      | 0.71–1.10 | 0.84    |      | 0.65–1.09 | 0.82     |      | 0.61–1.10 | 0.91     |      | 0.64–1.29 |
|                                                         | \$75,000 or more                                    | 1.15     |       | 0.96–1.36 | 0.85        |      | 0.66–1.09 | 0.84    |      | 0.62–1.13 | 0.90     |      | 0.65–1.26 | 0.95     |      | 0.65–1.40 |
| Marital status (ref: Married-Spouse Present)            | Never Married                                       | 0.90     |       | 0.78–1.04 | 0.86        |      | 0.69–1.07 | 0.91    |      | 0.71–1.17 | 0.89     |      | 0.66–1.19 | 0.94     |      | 0.65–1.36 |
|                                                         | Married-Spouse Absent or Widowed/Divorced/Separated | 1.04     |       | 0.93–1.18 | 1.02        |      | 0.86–1.21 | 1.13    |      | 0.93–1.38 | 1.20     |      | 0.95–1.50 | 1.22     |      | 0.94–1.59 |
| Employment status (ref: Employed)                       | Not in labor force or unemployed                    | 0.95     |       | 0.80–1.12 | 1.15        |      | 0.90–1.46 | 1.17    |      | 0.87–1.57 | 1.01     |      | 0.74–1.39 | 0.91     |      | 0.64–1.30 |
| Metropolitan status (ref: Non-MSA)                      | MSA                                                 | 1.21     | ***   | 1.07–1.36 | 1.14        |      | 0.96–1.36 | 1.17    |      | 0.95–1.44 | 1.22     |      | 0.95–1.55 | 1.21     |      | 0.92–1.59 |
| Indoor workers (ref: No)                                | Yes                                                 | 0.88     |       | 0.74–1.03 | 0.97        |      | 0.76–1.24 | 1.10    |      | 0.82–1.47 | 1.03     |      | 0.76–1.41 | 0.87     |      | 0.61–1.23 |
| Current smoking status (ref: Current Smokers)           | Ex-Smokers (<1 year)                                | 1.30     | ***   | 1.11–1.52 | 1.53        | ***  | 1.24–1.88 | 2.17    | ***  | 1.73–2.72 | 2.78     | ***  | 2.20–3.52 | 4.02     | ***  | 3.09–5.22 |
| Smoking frequency 12 months ago (ref: Everyday smokers) | Someday smokers                                     | 1.23     | **    | 1.01–1.49 | 1.57        | ***  | 1.17–2.11 | 1.68    | ***  | 1.18–2.39 | 1.69     | **   | 1.13–2.54 | 1.48     |      | 0.90–2.42 |
|                                                         | 5–14                                                | 1.37     | ***   | 1.13–1.66 | 1.70        | ***  | 1.26–2.31 | 2.05    | ***  | 1.42–2.97 | 2.16     | ***  | 1.41–3.31 | 2.17     | ***  | 1.29–3.63 |
|                                                         | 15–24                                               | 1.56     | ***   | 1.26–1.92 | 2.11        | ***  | 1.52–2.93 | 2.41    | ***  | 1.62–3.58 | 2.65     | ***  | 1.68–4.17 | 2.53     | ***  | 1.45–4.40 |

|                                                               |                    |          |           |          |            |           |            |           |            |          |            |
|---------------------------------------------------------------|--------------------|----------|-----------|----------|------------|-----------|------------|-----------|------------|----------|------------|
| Cigarette per day 12 months ago (ref: 1–4)                    | 25+                | 2.12 *** | 1.62–2.77 | 2.69 *** | 1.81–4.00  | 3.04 ***  | 1.89–4.88  | 3.17 ***  | 1.85–5.42  | 2.83 *** | 1.49–5.38  |
| First cigarette upon awakening § (ref: >30 min)               | ≤5 min             | 1.30 *** | 1.13–1.51 | 1.18     | 0.96–1.44  | 1.01      | 0.80–1.28  | 1.08      | 0.83–1.40  | 1.15     | 0.85–1.55  |
|                                                               | 5–30 min           | 1.18 *** | 1.05–1.32 | 0.93     | 0.78–1.10  | 0.89      | 0.73–1.08  | 0.86      | 0.69–1.06  | 0.75 **  | 0.57–0.98  |
| Smokeless tobacco use † (ref: No)                             | Yes                | 4.54 *** | 3.43–6.01 | 5.34 *** | 1.96–14.49 | 11.02 *** | 2.63–46.15 | 12.21 *** | 2.02–73.89 | 1.46     | 0.08–28.28 |
| State level cigarette tax ranking ‡ (ref: Lowest quarter)     | Med-low quarter    | 0.99     | 0.82–1.18 | 1.02     | 0.78–1.32  | 1.22      | 0.90–1.66  | 1.45 **   | 1.03–2.06  | 1.71 **  | 1.12–2.60  |
|                                                               | Med-high quarter   | 1.06     | 0.88–1.28 | 0.97     | 0.73–1.27  | 1.07      | 0.77–1.49  | 1.23      | 0.84–1.80  | 1.13     | 0.70–1.81  |
|                                                               | Highest quarter    | 1.00     | 0.79–1.26 | 0.82     | 0.57–1.18  | 0.97      | 0.62–1.52  | 1.22      | 0.74–2.01  | 1.10     | 0.59–2.03  |
| Tobacco control spending per capita ‡ (ref: Lowest quarter)   | Med-low quarter    | 0.82 *** | 0.71–0.95 | 0.77 **  | 0.62–0.95  | 0.85      | 0.66–1.10  | 0.86      | 0.65–1.14  | 0.98     | 0.71–1.36  |
|                                                               | Med-high quarter   | 0.78 *** | 0.67–0.91 | 0.83     | 0.65–1.04  | 0.86      | 0.66–1.13  | 0.74 *    | 0.55–1.00  | 0.75     | 0.51–1.08  |
|                                                               | Highest quarter    | 0.82 **  | 0.69–0.98 | 0.70 *** | 0.54–0.92  | 0.77 *    | 0.57–1.04  | 0.72 *    | 0.52–1.00  | 0.69 *   | 0.46–1.04  |
| State level worksite smoking ban (ref: Not highest level)     | Highest level      | 0.99     | 0.85–1.15 | 1.03     | 0.81–1.30  | 0.86      | 0.66–1.13  | 0.76 *    | 0.56–1.02  | 0.79     | 0.56–1.11  |
| State level worksite e-cigarette ban (ref: Not highest level) | Highest level      | 0.81     | 0.59–1.12 | 0.90     | 0.55–1.47  | 0.89      | 0.49–1.61  | 0.79      | 0.40–1.56  | 0.91     | 0.38–2.17  |
| State level e-cigarette tax (ref: No)                         | Yes                | 1.21     | 0.81–1.80 | 0.69     | 0.36–1.34  | 0.54      | 0.25–1.18  | 0.56      | 0.23–1.33  | 1.03     | 0.39–2.73  |
| Survey time (ref: July 2014)                                  | Jan 2015           | 1.03     | 0.92–1.16 | 0.96     | 0.81–1.13  | 0.94      | 0.77–1.15  | 0.97      | 0.77–1.22  | 0.86     | 0.66–1.12  |
|                                                               | May 2015           | 0.90 *   | 0.80–1.02 | 0.78 *** | 0.65–0.93  | 0.85      | 0.69–1.04  | 0.94      | 0.75–1.18  | 0.93     | 0.71–1.21  |
| Census division (ref: Pacific)                                | East North Central | 0.83     | 0.65–1.05 | 1.05     | 0.73–1.51  | 1.12      | 0.73–1.71  | 0.97      | 0.61–1.54  | 0.91     | 0.53–1.56  |
|                                                               | East South Central | 0.86     | 0.68–1.09 | 0.99     | 0.70–1.42  | 1.21      | 0.81–1.82  | 1.18      | 0.76–1.84  | 1.08     | 0.65–1.80  |
|                                                               | Middle Atlantic    | 0.94     | 0.72–1.22 | 1.07     | 0.71–1.61  | 1.18      | 0.73–1.93  | 1.10      | 0.63–1.92  | 1.05     | 0.54–2.04  |
|                                                               | Mountain           | 1.06     | 0.82–1.36 | 1.21     | 0.83–1.76  | 1.32      | 0.85–2.05  | 1.29      | 0.80–2.08  | 1.18     | 0.68–2.07  |
|                                                               | New England        | 0.69 **  | 0.52–0.92 | 1.10     | 0.72–1.69  | 1.16      | 0.70–1.94  | 1.07      | 0.62–1.86  | 1.15     | 0.59–2.24  |
|                                                               | South Atlantic     | 0.86     | 0.69–1.07 | 1.04     | 0.75–1.45  | 1.16      | 0.79–1.72  | 1.14      | 0.75–1.75  | 1.28     | 0.78–2.08  |
|                                                               | West North Central | 0.81     | 0.63–1.05 | 1.05     | 0.72–1.53  | 1.29      | 0.83–2.01  | 1.19      | 0.74–1.94  | 0.97     | 0.54–1.72  |
|                                                               | West South Central | 0.84     | 0.66–1.06 | 0.97     | 0.68–1.37  | 1.05      | 0.69–1.58  | 0.90      | 0.57–1.42  | 1.08     | 0.63–1.84  |

Δ Odds ratio and significance level of *p*-value: "\*\*\*\*" < 0.01; 0.01 < "\*\*\*" < 0.05; 0.05 < "\*" <= 0.1; § The time reported for current smokers was their current habit while for quitters in last year was their habit one year ago; † Smokeless tobacco use and e-cigarette use were using the same measure in each model; ‡ Data for state level cigarette tax ranking are in Jan 2015 and tobacco control spending per capita are in 2015.

**Supplementary Table S3a. Logistic Regression Equations, Male Former Smokers Who Quit More Than One Year and Less Than or Equal to Three Years, Ever, Current (at Least Once in the Last 30 Days), 5 or More, 10 or More, 20 or More of the Last 30 Days Measures of E-cigarette Use, TUS-CPS, 2014/5**

| Variable                                     | Category                                            | Ever use |       |           | Current use |      |           | >5 days |      |           | >10 days |      |           | >20 days |      |            |
|----------------------------------------------|-----------------------------------------------------|----------|-------|-----------|-------------|------|-----------|---------|------|-----------|----------|------|-----------|----------|------|------------|
|                                              |                                                     | OR       | ProbΔ | 95% CI    | OR          | Prob | 95% CI    | OR      | Prob | 95% CI    | OR       | Prob | 95% CI    | OR       | Prob | 95% CI     |
| Intercept                                    |                                                     | 0.06     | ***   | 0.02–0.18 | 0.02        | ***  | 0.00–0.12 | 0.02    | ***  | 0.00–0.09 | 0.02     | ***  | 0.00–0.09 | 0.01     | ***  | 0.00–0.08  |
| Age (ref: 35–44)                             | 18–24                                               | 1.73     | *     | 0.92–3.24 | 0.97        |      | 0.38–2.51 | 0.90    |      | 0.35–2.34 | 0.89     |      | 0.34–2.32 | 0.57     |      | 0.17–1.91  |
|                                              | 22–25                                               | 1.13     |       | 0.76–1.69 | 0.58        | *    | 0.32–1.07 | 0.53    | *    | 0.28–1.01 | 0.51     | **   | 0.26–0.98 | 0.60     |      | 0.30–1.19  |
|                                              | 45–64                                               | 0.93     |       | 0.61–1.41 | 0.75        |      | 0.41–1.36 | 0.75    |      | 0.41–1.39 | 0.81     |      | 0.43–1.51 | 0.91     |      | 0.47–1.75  |
|                                              | 65+                                                 | 0.41     | ***   | 0.21–0.79 | 0.61        |      | 0.23–1.67 | 0.65    |      | 0.24–1.80 | 0.68     |      | 0.24–1.92 | 0.67     |      | 0.22–2.09  |
| Race (ref: White)                            | Asian                                               | 1.03     |       | 0.48–2.22 | 2.09        |      | 0.73–5.98 | 1.47    |      | 0.42–5.16 | 1.48     |      | 0.42–5.22 | 1.34     |      | 0.32–5.54  |
|                                              | Black                                               | 0.55     |       | 0.27–1.13 | 0.13        | *    | 0.02–1.02 | 0.14    | *    | 0.02–1.07 | 0.14     | *    | 0.02–1.10 | 0.18     | *    | 0.02–1.35  |
|                                              | Other races                                         | 0.55     |       | 0.25–1.24 | 0.68        |      | 0.18–2.54 | 0.78    |      | 0.20–3.00 | 0.80     |      | 0.21–3.06 | 0.49     |      | 0.12–1.99  |
| Hispanic (ref: Non-Hispanic)                 | Hispanic                                            | 0.78     |       | 0.45–1.36 | 0.24        | **   | 0.07–0.85 | 0.10    | ***  | 0.02–0.51 | 0.05     | ***  | 0.01–0.43 | 0.06     | **   | 0.01–0.58  |
| Education (ref: Less than 12 years)          | High school degree                                  | 1.73     | *     | 0.92–3.25 | 1.47        |      | 0.54–3.97 | 1.25    |      | 0.47–3.35 | 1.26     |      | 0.47–3.40 | 1.55     |      | 0.54–4.40  |
|                                              | Associate degree                                    | 1.94     | **    | 1.05–3.59 | 1.82        |      | 0.67–4.93 | 1.40    |      | 0.53–3.72 | 1.30     |      | 0.49–3.49 | 1.40     |      | 0.50–3.93  |
|                                              | College degree or higher                            | 1.89     | *     | 0.98–3.65 | 0.72        |      | 0.24–2.19 | 0.62    |      | 0.21–1.86 | 0.61     |      | 0.20–1.85 | 0.76     |      | 0.23–2.46  |
| Family income (ref: \$0–\$19,999)            | \$20,000–\$39,999                                   | 2.59     | ***   | 1.45–4.64 | 2.00        |      | 0.75–5.32 | 2.81    | *    | 0.98–8.08 | 2.92     | *    | 0.99–8.55 | 4.19     | **   | 1.23–14.30 |
|                                              | \$40,000–\$74,999                                   | 1.78     | *     | 0.98–3.23 | 1.14        |      | 0.41–3.16 | 1.58    |      | 0.51–4.86 | 1.62     |      | 0.51–5.09 | 2.38     |      | 0.64–8.88  |
|                                              | \$75,000 or more                                    | 1.72     | *     | 0.91–3.23 | 1.50        |      | 0.51–4.39 | 2.04    |      | 0.61–6.83 | 1.82     |      | 0.53–6.20 | 2.46     |      | 0.60–10.09 |
| Marital status (ref: Married-Spouse Present) | Never Married                                       | 0.95     |       | 0.66–1.37 | 0.55        | **   | 0.31–0.96 | 0.47    | **   | 0.26–0.86 | 0.48     | **   | 0.26–0.88 | 0.47     | **   | 0.24–0.92  |
|                                              | Married-Spouse Absent or Widowed/Divorced/Separated | 1.28     |       | 0.86–1.90 | 0.70        |      | 0.38–1.28 | 0.73    |      | 0.39–1.34 | 0.68     |      | 0.37–1.24 | 0.77     |      | 0.40–1.45  |
| Employment status (ref: Employed)            | Not in labor force or unemployed                    | 1.12     |       | 0.70–1.79 | 0.74        |      | 0.33–1.66 | 0.69    |      | 0.29–1.62 | 0.74     |      | 0.31–1.79 | 0.83     |      | 0.31–2.22  |
| Metropolitan status (ref: Non-MSA)           | MSA                                                 | 1.52     | **    | 1.02–2.25 | 1.90        | **   | 1.04–3.49 | 1.79    | *    | 0.97–3.31 | 1.84     | *    | 0.98–3.42 | 1.46     |      | 0.76–2.80  |
| Indoor workers (ref: No)                     | Yes                                                 | 1.46     | **    | 1.03–2.08 | 1.36        |      | 0.79–2.35 | 1.39    |      | 0.79–2.45 | 1.55     |      | 0.87–2.76 | 2.03     | **   | 1.08–3.80  |

|                                                               |                    |          |           |        |           |         |            |         |            |         |            |
|---------------------------------------------------------------|--------------------|----------|-----------|--------|-----------|---------|------------|---------|------------|---------|------------|
| Smokeless tobacco use § (ref: No)                             | Yes                | 2.52 *** | 1.84–3.44 | 0.50   | 0.19–1.37 | 0.38    | 0.11–1.25  | 0.42    | 0.13–1.40  | 0.42    | 0.11–1.55  |
| State level cigarette tax ranking † (ref: Lowest quarter)     | Med-low quarter    | 1.08     | 0.59–1.97 | 0.85   | 0.33–2.21 | 0.84    | 0.31–2.24  | 0.83    | 0.31–2.24  | 0.76    | 0.27–2.13  |
|                                                               | Med-high quarter   | 1.33     | 0.73–2.41 | 1.85   | 0.77–4.44 | 2.03    | 0.84–4.90  | 2.07    | 0.84–5.06  | 2.08    | 0.82–5.24  |
|                                                               | Highest quarter    | 1.88 *   | 0.91–3.87 | 1.95   | 0.61–6.24 | 1.90    | 0.58–6.25  | 2.16    | 0.65–7.23  | 2.37    | 0.65–8.56  |
| Tobacco control spending per capita † (ref: Lowest quarter)   | Med-low quarter    | 0.99     | 0.63–1.56 | 0.94   | 0.45–1.97 | 0.91    | 0.44–1.87  | 0.97    | 0.47–2.00  | 1.03    | 0.47–2.24  |
|                                                               | Med-high quarter   | 1.13     | 0.69–1.84 | 1.63   | 0.77–3.45 | 1.46    | 0.67–3.15  | 1.44    | 0.66–3.10  | 1.17    | 0.53–2.61  |
|                                                               | Highest quarter    | 1.07     | 0.62–1.86 | 1.37   | 0.58–3.22 | 1.31    | 0.54–3.21  | 1.34    | 0.56–3.22  | 1.14    | 0.44–2.92  |
| State level worksite smoking ban (ref: Not highest level)     | Highest level      | 0.87     | 0.54–1.40 | 1.06   | 0.50–2.22 | 1.29    | 0.58–2.86  | 1.16    | 0.52–2.55  | 1.16    | 0.50–2.71  |
| State level worksite e-cigarette ban (ref: Not highest level) | Highest level      | 0.99     | 0.45–2.15 | 0.91   | 0.29–2.80 | 0.81    | 0.25–2.64  | 0.79    | 0.24–2.62  | 1.00    | 0.28–3.52  |
| State level e-cigarette tax (ref: No)                         | Yes                | 0.88     | 0.30–2.56 | 1.03   | 0.18–5.81 | 1.04    | 0.18–6.13  | 1.01    | 0.17–6.10  | 0.56    | 0.08–3.97  |
| Survey time (ref: July 2014)                                  | Jan 2015           | 1.32     | 0.93–1.87 | 1.61 * | 0.92–2.80 | 1.53    | 0.87–2.67  | 1.71 *  | 0.96–3.04  | 1.73 *  | 0.92–3.22  |
|                                                               | May 2015           | 1.46 **  | 1.02–2.07 | 1.45   | 0.82–2.55 | 1.64 *  | 0.94–2.85  | 1.76 *  | 0.99–3.13  | 1.66    | 0.89–3.08  |
| Census division (ref: Pacific)                                | East North Central | 0.53 *   | 0.27–1.07 | 1.06   | 0.35–3.17 | 1.10    | 0.35–3.52  | 0.99    | 0.31–3.16  | 0.60    | 0.18–2.01  |
|                                                               | East South Central | 0.91     | 0.44–1.88 | 2.51 * | 0.86–7.34 | 3.45 ** | 1.09–10.96 | 3.32 ** | 1.04–10.58 | 3.29 ** | 1.01–10.72 |
|                                                               | Middle Atlantic    | 0.37 *** | 0.18–0.76 | 0.62   | 0.21–1.84 | 0.80    | 0.25–2.56  | 0.80    | 0.25–2.56  | 0.46    | 0.13–1.62  |
|                                                               | Mountain           | 0.97     | 0.47–1.99 | 1.69   | 0.58–4.93 | 1.96    | 0.61–6.30  | 2.09    | 0.65–6.67  | 2.46    | 0.72–8.38  |
|                                                               | New England        | 0.31 *** | 0.14–0.71 | 0.52   | 0.13–2.11 | 0.63    | 0.14–2.77  | 0.57    | 0.13–2.51  | 0.45    | 0.10–2.11  |
|                                                               | South Atlantic     | 0.87     | 0.47–1.61 | 1.94   | 0.76–4.97 | 2.62 *  | 0.94–7.29  | 2.34    | 0.83–6.58  | 1.91    | 0.64–5.75  |
|                                                               | West North Central | 0.74     | 0.35–1.57 | 0.71   | 0.20–2.60 | 0.91    | 0.23–3.55  | 0.93    | 0.24–3.63  | 0.64    | 0.16–2.59  |
|                                                               | West South Central | 0.76     | 0.39–1.47 | 1.56   | 0.58–4.16 | 2.08    | 0.72–5.94  | 2.12    | 0.74–6.04  | 2.02    | 0.67–6.09  |
|                                                               |                    |          |           |        |           |         |            |         |            |         |            |

Δ Odds ratio and significance level of  $p$ -value: "\*\*\*\*" < 0.01; 0.01 < "\*\*\*" < 0.05; 0.05 < "\*\*" < 0.1; § Smokeless tobacco use and e-cigarette use were using the same measure in each model; \*\* Data for state level cigarette tax ranking are in Jan 2015 and tobacco control spending per capita are in 2015.

**Supplementary Table S3b. Logistic Regression Equations, Female Former Smokers Who Quit More Than One Year and Less Than or Equal to Three Years, Ever, Current (at Least Once in the Last 30 Days), 5 or More, 10 or More, 20 or More of the Last 30 Days Measures of E-cigarette Use, TUS-CPS, 2014/5**

| Variable                                                    | Category                                            | Ever use |       |            | Current use |      |           | >5 days |      |           | >10 days |      |           | >20 days |      |           |
|-------------------------------------------------------------|-----------------------------------------------------|----------|-------|------------|-------------|------|-----------|---------|------|-----------|----------|------|-----------|----------|------|-----------|
|                                                             |                                                     | OR       | ProbΔ | 95% CI     | OR          | Prob | 95% CI    | OR      | Prob | 95% CI    | OR       | Prob | 95% CI    | OR       | Prob | 95% CI    |
| Intercept                                                   |                                                     | 0.20     | ***   | 0.06–0.64  | 0.05        | ***  | 0.01–0.30 | 0.05    | ***  | 0.01–0.36 | 0.05     | ***  | 0.01–0.36 | 0.05     | ***  | 0.01–0.45 |
| Age (ref: 35–44)                                            | 18–24                                               | 1.20     |       | 0.61–2.38  | 0.16        | **   | 0.04–0.68 | 0.08    | ***  | 0.01–0.46 | 0.08     | ***  | 0.01–0.49 | 0.03     | ***  | 0.00–0.23 |
|                                                             | 22–25                                               | 1.06     |       | 0.68–1.65  | 0.74        |      | 0.37–1.49 | 0.72    |      | 0.34–1.51 | 0.71     |      | 0.33–1.53 | 0.71     |      | 0.31–1.63 |
|                                                             | 45–64                                               | 1.06     |       | 0.70–1.63  | 1.11        |      | 0.62–1.99 | 1.13    |      | 0.61–2.08 | 1.28     |      | 0.68–2.41 | 1.54     |      | 0.77–3.06 |
|                                                             | 65+                                                 | 0.82     |       | 0.44–1.54  | 0.75        |      | 0.31–1.82 | 0.76    |      | 0.30–1.94 | 0.77     |      | 0.29–2.05 | 1.01     |      | 0.36–2.84 |
| Race (ref: White)                                           | Asian                                               | 0.64     |       | 0.18–2.35  | 0.13        | *    | 0.01–1.14 | 0.15    | *    | 0.02–1.37 | 0.20     |      | 0.02–1.75 | 0.26     |      | 0.03–2.28 |
|                                                             | Black                                               | 0.62     |       | 0.33–1.17  | 0.47        |      | 0.17–1.30 | 0.50    |      | 0.17–1.41 | 0.57     |      | 0.20–1.61 | 0.57     |      | 0.19–1.74 |
|                                                             | Other races                                         | 2.75     | ***   | 1.41–5.34  | 2.45        | *    | 0.97–6.18 | 2.81    | **   | 1.09–7.22 | 3.12     | **   | 1.26–7.74 | 3.77     | ***  | 1.46–9.72 |
| Hispanic (ref: Non-Hispanic)                                | Hispanic                                            | 0.45     | **    | 0.23–0.88  | 0.39        |      | 0.11–1.33 | 0.45    |      | 0.13–1.56 | 0.53     |      | 0.15–1.87 | 0.70     |      | 0.20–2.42 |
| Education (ref: Less than 12 years)                         | High school degree                                  | 1.27     |       | 0.69–2.34  | 0.95        |      | 0.41–2.21 | 1.14    |      | 0.46–2.86 | 1.12     |      | 0.44–2.83 | 1.36     |      | 0.49–3.73 |
|                                                             | Associate degree                                    | 1.30     |       | 0.70–2.42  | 1.40        |      | 0.60–3.28 | 1.62    |      | 0.64–4.09 | 1.43     |      | 0.56–3.69 | 1.59     |      | 0.57–4.45 |
|                                                             | College degree or higher                            | 0.99     |       | 0.52–1.89  | 0.63        |      | 0.25–1.60 | 0.72    |      | 0.27–1.96 | 0.65     |      | 0.23–1.84 | 0.70     |      | 0.23–2.17 |
| Family income (ref: \$0–\$19,999)                           | \$20,000–\$39,999                                   | 1.01     |       | 0.63–1.61  | 1.26        |      | 0.63–2.51 | 1.18    |      | 0.58–2.43 | 1.23     |      | 0.60–2.51 | 1.09     |      | 0.51–2.34 |
|                                                             | \$40,000–\$74,999                                   | 1.29     |       | 0.80–2.08  | 1.49        |      | 0.75–2.97 | 1.24    |      | 0.60–2.55 | 1.25     |      | 0.59–2.64 | 1.25     |      | 0.57–2.73 |
|                                                             | \$75,000 or more                                    | 0.87     |       | 0.52–1.47  | 1.61        |      | 0.76–3.44 | 1.47    |      | 0.67–3.22 | 1.46     |      | 0.65–3.26 | 1.38     |      | 0.58–3.26 |
| Marital status (ref: Married-Spouse Present)                | Never Married                                       | 1.20     |       | 0.80–1.80  | 0.86        |      | 0.42–1.73 | 0.71    |      | 0.32–1.55 | 0.77     |      | 0.35–1.70 | 0.90     |      | 0.40–2.01 |
|                                                             | Married-Spouse Absent or Widowed/Divorced/Separated | 1.06     |       | 0.74–1.53  | 1.28        |      | 0.75–2.20 | 1.20    |      | 0.69–2.09 | 1.06     |      | 0.60–1.88 | 0.86     |      | 0.47–1.57 |
| Employment status (ref: Employed)                           | Not in labor force or unemployed                    | 0.83     |       | 0.50–1.40  | 1.68        |      | 0.80–3.51 | 1.40    |      | 0.65–2.99 | 1.22     |      | 0.56–2.63 | 1.11     |      | 0.49–2.49 |
| Metropolitan status (ref: Non-MSA)                          | MSA                                                 | 1.21     |       | 0.83–1.75  | 1.78        | *    | 0.99–3.17 | 1.98    | **   | 1.07–3.66 | 1.71     | *    | 0.94–3.11 | 1.73     | *    | 0.90–3.31 |
| Indoor workers (ref: No)                                    | Yes                                                 | 1.26     |       | 0.79–2.02  | 0.95        |      | 0.44–2.05 | 0.84    |      | 0.39–1.82 | 0.81     |      | 0.37–1.78 | 0.77     |      | 0.33–1.80 |
| Smokeless tobacco use § (ref: No)                           | Yes                                                 | 6.12     | ***   | 2.79–13.41 | 0.00        | ***  | 0.00–0.00 | 0.00    | ***  | 0.00–0.00 | 0.00     | ***  | 0.00–0.00 | 0.00     | ***  | 0.00–0.00 |
| State level cigarette tax ranking † (ref: Lowest quarter)   | Med-low quarter                                     | 1.03     |       | 0.59–1.81  | 0.95        |      | 0.47–1.95 | 1.02    |      | 0.48–2.16 | 0.78     |      | 0.36–1.69 | 0.83     |      | 0.35–1.99 |
|                                                             | Med-high quarter                                    | 1.35     |       | 0.76–2.40  | 1.12        |      | 0.50–2.48 | 1.00    |      | 0.42–2.40 | 1.07     |      | 0.45–2.52 | 0.83     |      | 0.30–2.29 |
|                                                             | Highest quarter                                     | 1.92     | *     | 0.92–3.99  | 1.17        |      | 0.36–3.78 | 1.11    |      | 0.31–3.97 | 1.17     |      | 0.34–4.00 | 0.98     |      | 0.24–4.02 |
| Tobacco control spending per capita † (ref: Lowest quarter) | Med-low quarter                                     | 1.37     |       | 0.87–2.15  | 1.87        | *    | 0.99–3.55 | 1.57    |      | 0.80–3.08 | 1.46     |      | 0.75–2.84 | 1.36     |      | 0.67–2.74 |
|                                                             | Med-high quarter                                    | 1.06     |       | 0.65–1.72  | 0.51        | *    | 0.26–1.01 | 0.44    | **   | 0.21–0.90 | 0.45     | **   | 0.22–0.91 | 0.38     | **   | 0.17–0.82 |
|                                                             | Highest quarter                                     | 1.11     |       | 0.65–1.90  | 1.39        |      | 0.65–2.99 | 1.27    |      | 0.58–2.76 | 1.16     |      | 0.55–2.42 | 1.18     |      | 0.54–2.61 |

|                                                               |                    |                    |                     |                    |                  |                    |
|---------------------------------------------------------------|--------------------|--------------------|---------------------|--------------------|------------------|--------------------|
| State level worksite smoking ban (ref: Not highest level)     | Highest level      | 0.58 ** 0.36–0.92  | 0.41 *** 0.21–0.78  | 0.43 ** 0.22–0.83  | 0.54 * 0.27–1.08 | 0.52 * 0.24–1.08   |
| State level worksite e-cigarette ban (ref: Not highest level) | Highest level      | 1.26 0.60–2.65     | 2.22 * 0.86–5.73    | 2.45 * 0.89–6.79   | 2.33 * 0.88–6.17 | 2.30 0.74–7.09     |
| State level e-cigarette tax (ref: No)                         | Yes                | 1.01 0.28–3.59     | 9.72 *** 1.78–52.99 | 5.73 ** 1.01–32.45 | 3.96 0.74–21.14  | 6.20 ** 1.03–37.38 |
| Survey time (ref: July 2014)                                  | Jan 2015           | 1.03 0.72–1.46     | 0.85 0.50–1.43      | 0.86 0.49–1.49     | 1.01 0.56–1.80   | 0.97 0.52–1.82     |
|                                                               | May 2015           | 1.25 0.88–1.79     | 1.24 0.73–2.11      | 1.37 0.79–2.37     | 1.67 * 0.94–2.96 | 1.56 0.85–2.89     |
| Census division (ref: Pacific)                                | East North Central | 1.18 0.56–2.48     | 0.80 0.24–2.66      | 0.86 0.26–2.88     | 0.66 0.19–2.23   | 0.67 0.18–2.45     |
|                                                               | East South Central | 0.99 0.44–2.23     | 1.43 0.42–4.86      | 1.45 0.41–5.06     | 1.72 0.47–6.27   | 1.43 0.35–5.79     |
|                                                               | Middle Atlantic    | 0.76 0.34–1.67     | 1.42 0.42–4.83      | 1.37 0.38–4.91     | 1.22 0.35–4.28   | 1.33 0.34–5.18     |
|                                                               | Mountain           | 2.52 *** 1.26–5.05 | 3.00 ** 1.06–8.50   | 2.34 0.81–6.76     | 2.20 0.74–6.57   | 1.74 0.55–5.47     |
|                                                               | New England        | 0.50 * 0.22–1.13   | 1.04 0.29–3.73      | 0.94 0.25–3.59     | 0.90 0.24–3.37   | 1.05 0.26–4.22     |
|                                                               | South Atlantic     | 1.12 0.58–2.16     | 0.98 0.29–3.27      | 0.87 0.24–3.10     | 0.94 0.26–3.45   | 0.82 0.19–3.48     |
|                                                               | West North Central | 1.13 0.53–2.39     | 1.97 0.61–6.34      | 1.91 0.58–6.30     | 2.09 0.63–6.90   | 1.68 0.47–6.05     |
|                                                               | West South Central | 1.72 0.87–3.40     | 1.31 0.45–3.82      | 1.37 0.46–4.06     | 1.24 0.39–3.90   | 0.90 0.27–3.04     |

Δ Odds ratio and significance level of  $p$ -value: "\*\*\*\*" < 0.01; 0.01 < "\*\*\*" < 0.05; 0.05 < "\*" < 0.1; § Smokeless tobacco use and e-cigarette use were using the same measure in each model; † Data for state level cigarette tax ranking are in Jan 2015 and tobacco control spending per capita are in 2015.

**Supplementary Table S4a. Logistic Regression Equations, Male Former Smokers Who Quit More Than Three Years, Ever, Current (at Least Once in the Last 30 Days), 5 or More, 10 or More, 20 or More of the Last 30 Days Measures of E-cigarette Use, TUS-CPS, 2014/5**

| Variable                            | Category                 | Ever use |       |            | Current use |      |           | >5 days  |       |            | >10 days |      |            | >20 days |      |            |
|-------------------------------------|--------------------------|----------|-------|------------|-------------|------|-----------|----------|-------|------------|----------|------|------------|----------|------|------------|
|                                     |                          | OR       | ProbΔ | 95% CI     | OR          | Prob | 95% CI    | OR       | Pr ob | 95% CI     | OR       | Prob | 95% CI     | OR       | Prob | 95% CI     |
| Intercept                           |                          | 0.01 *** |       | 0.00–0.03  | 0.00 ***    |      | 0.00–0.02 | 0.00 *** |       | 0.00–0.01  | 0.00 *** |      | 0.00–0.01  | 0.00 *** |      | 0.00–0.01  |
| Age (ref: 35–44)                    | 18–24                    | 5.06 *** |       | 2.36–10.86 | 1.69        |      | 0.37–7.69 | 1.82     |       | 0.39–8.48  | 1.04     |      | 0.15–7.39  | 1.14     |      | 0.17–7.64  |
|                                     | 22–25                    | 2.73 *** |       | 1.97–3.77  | 1.44        |      | 0.75–2.77 | 1.41     |       | 0.67–2.98  | 1.46     |      | 0.69–3.13  | 1.38     |      | 0.59–3.21  |
|                                     | 45–64                    | 0.49 *** |       | 0.36–0.67  | 0.48 **     |      | 0.25–0.93 | 0.55 *   |       | 0.27–1.10  | 0.56     |      | 0.28–1.15  | 0.40 **  |      | 0.18–0.92  |
|                                     | 65+                      | 0.15 *** |       | 0.09–0.23  | 0.11 ***    |      | 0.04–0.30 | 0.13 *** |       | 0.05–0.38  | 0.13 *** |      | 0.05–0.38  | 0.12 *** |      | 0.04–0.40  |
| Race (ref: White)                   | Asian                    | 0.61     |       | 0.28–1.35  | 0.00 ***    |      | 0.00–0.00 | 0.00 *** |       | 0.00–0.00  | 0.00 *** |      | 0.00–0.00  | 0.00 *** |      | 0.00–0.00  |
|                                     | Black                    | 0.63     |       | 0.32–1.24  | 0.26        |      | 0.03–2.05 | 0.27     |       | 0.03–2.15  | 0.28     |      | 0.03–2.17  | 0.37     |      | 0.05–3.01  |
|                                     | Other races              | 0.86     |       | 0.35–2.08  | 1.94        |      | 0.63–5.96 | 0.40     |       | 0.08–2.00  | 0.32     |      | 0.05–2.29  | 0.44     |      | 0.06–3.24  |
| Hispanic (ref: Non-Hispanic)        | Hispanic                 | 0.80     |       | 0.50–1.28  | 0.79        |      | 0.30–2.07 | 1.30     |       | 0.56–3.03  | 1.15     |      | 0.48–2.76  | 1.14     |      | 0.42–3.12  |
| Education (ref: Less than 12 years) | High school degree       | 1.44     |       | 0.83–2.48  | 0.66        |      | 0.22–1.96 | 1.88     |       | 0.57–6.25  | 1.86     |      | 0.56–6.23  | 3.10     |      | 0.71–13.59 |
|                                     | Associate degree         | 1.70 *   |       | 0.98–2.94  | 1.12        |      | 0.36–3.44 | 3.37 **  |       | 1.05–10.88 | 3.27 **  |      | 1.00–10.64 | 5.18 **  |      | 1.24–21.68 |
|                                     | College degree or higher | 1.46     |       | 0.81–2.62  | 0.85        |      | 0.26–2.82 | 2.86 *   |       | 0.86–9.51  | 2.93 *   |      | 0.87–9.80  | 3.27     |      | 0.76–14.11 |

|                                                               |                                                      |      |     |           |      |   |           |      |     |            |      |     |            |      |     |            |
|---------------------------------------------------------------|------------------------------------------------------|------|-----|-----------|------|---|-----------|------|-----|------------|------|-----|------------|------|-----|------------|
| Family income (ref: \$0–\$19,999)                             | \$20,000–\$39,999                                    | 0.92 |     | 0.58–1.47 | 1.31 |   | 0.54–3.19 | 1.48 |     | 0.55–3.97  | 1.45 |     | 0.54–3.88  | 1.55 |     | 0.48–5.02  |
|                                                               | \$40,000–\$74,999                                    | 0.80 |     | 0.50–1.27 | 0.99 |   | 0.40–2.47 | 0.97 |     | 0.35–2.64  | 0.90 |     | 0.33–2.43  | 0.91 |     | 0.26–3.18  |
|                                                               | \$75,000 or more                                     | 0.97 |     | 0.60–1.58 | 0.94 |   | 0.32–2.74 | 0.66 |     | 0.22–2.02  | 0.56 |     | 0.19–1.66  | 0.70 |     | 0.18–2.68  |
| Marital status (ref: Married–Spouse Present)                  | Never Married                                        | 1.82 | *** | 1.35–2.45 | 1.35 |   | 0.69–2.62 | 1.33 |     | 0.65–2.74  | 1.27 |     | 0.61–2.64  | 1.09 |     | 0.47–2.54  |
|                                                               | Married–Spouse Absent or Widowed/Divorced /Separated | 1.82 | *** | 1.34–2.47 | 1.81 | * | 0.94–3.50 | 1.36 |     | 0.70–2.64  | 1.27 |     | 0.65–2.49  | 1.15 |     | 0.53–2.51  |
|                                                               |                                                      |      |     |           |      |   |           |      |     |            |      |     |            |      |     |            |
| Employment status (ref: Employed)                             | Not in labor force or unemployed                     | 0.97 |     | 0.67–1.40 | 0.89 |   | 0.43–1.83 | 1.00 |     | 0.43–2.31  | 0.95 |     | 0.41–2.23  | 0.94 |     | 0.34–2.58  |
| Metropolitan status (ref: Non–MSA)                            | MSA                                                  | 1.46 | **  | 1.07–1.99 | 1.27 |   | 0.71–2.25 | 1.22 |     | 0.63–2.33  | 1.19 |     | 0.62–2.30  | 0.83 |     | 0.40–1.75  |
| Indoor workers (ref: No)                                      | Yes                                                  | 1.26 |     | 0.96–1.66 | 1.22 |   | 0.68–2.18 | 1.66 |     | 0.88–3.14  | 1.58 |     | 0.83–3.02  | 1.48 |     | 0.71–3.09  |
| Smokeless tobacco use § (ref: No)                             | Yes                                                  | 3.44 | *** | 2.67–4.42 | 1.24 |   | 0.49–3.11 | 0.87 |     | 0.29–2.61  | 0.87 |     | 0.27–2.78  | 0.00 | *** | 0.00–0.00  |
| State level cigarette tax ranking † (ref: Lowest quarter)     | Med–low quarter                                      | 1.61 | *   | 0.98–2.64 | 1.20 |   | 0.49–2.94 | 1.19 |     | 0.47–3.01  | 1.12 |     | 0.43–2.91  | 1.48 |     | 0.50–4.39  |
|                                                               | Med–high quarter                                     | 1.54 | *   | 0.93–2.56 | 1.13 |   | 0.46–2.78 | 0.86 |     | 0.36–2.09  | 0.89 |     | 0.37–2.12  | 0.91 |     | 0.31–2.65  |
|                                                               | Highest quarter                                      | 2.04 | **  | 1.11–3.74 | 1.96 |   | 0.53–7.22 | 3.45 | *   | 0.98–12.07 | 3.34 | *   | 0.96–11.64 | 2.77 |     | 0.65–11.78 |
| Tobacco control spending per capita † (ref: Lowest quarter)   | Med–low quarter                                      | 1.18 |     | 0.81–1.74 | 1.43 |   | 0.59–3.45 | 1.52 |     | 0.61–3.78  | 1.61 |     | 0.63–4.07  | 1.62 |     | 0.55–4.82  |
|                                                               | Med–high quarter                                     | 1.16 |     | 0.81–1.65 | 1.44 |   | 0.68–3.03 | 1.74 |     | 0.85–3.55  | 1.92 | *   | 0.93–3.96  | 1.23 |     | 0.50–3.03  |
|                                                               | Highest quarter                                      | 1.02 |     | 0.66–1.57 | 1.23 |   | 0.48–3.13 | 1.11 |     | 0.36–3.44  | 0.99 |     | 0.28–3.51  | 0.88 |     | 0.22–3.43  |
| State level worksite smoking ban (ref: Not highest level)     | Highest level                                        | 0.76 |     | 0.52–1.12 | 0.94 |   | 0.46–1.91 | 0.92 |     | 0.44–1.95  | 0.92 |     | 0.43–1.95  | 0.65 |     | 0.27–1.55  |
| State level worksite e–cigarette ban (ref: Not highest level) | Highest level                                        | 1.09 |     | 0.60–1.99 | 0.28 |   | 0.04–2.10 | 0.00 | *** | 0.00–0.00  | 0.00 | *** | 0.00–0.00  | 0.00 | *** | 0.00–0.00  |
| State level e–cigarette tax (ref: No)                         | Yes                                                  | 0.38 | *   | 0.13–1.12 | 1.23 |   | 0.20–7.49 | 0.39 |     | 0.06–2.74  | 0.44 |     | 0.06–3.12  | 2.00 |     | 0.20–20.14 |
| Survey time (ref: July 2014)                                  | Jan 2015                                             | 1.03 |     | 0.78–1.35 | 1.67 |   | 0.89–3.16 | 1.44 |     | 0.74–2.81  | 1.61 |     | 0.81–3.20  | 1.71 |     | 0.74–3.95  |

|                                   | May 2015           | 1.01 | 0.76–1.34 | 1.91      | **   | 1.02–3.58 | 1.70      | 0.88–3.29 | 1.87       | *         | 0.94–3.71 | 2.14       | *         | 0.95–4.80 |            |           |
|-----------------------------------|--------------------|------|-----------|-----------|------|-----------|-----------|-----------|------------|-----------|-----------|------------|-----------|-----------|------------|-----------|
| Census division<br>(ref: Pacific) | East North Central | 1.02 | 0.61–1.71 | 0.55      |      | 0.17–1.83 | 0.61      | 0.16–2.31 | 0.62       |           | 0.16–2.37 | 0.64       |           | 0.11–3.60 |            |           |
|                                   | East South Central | 1.03 | 0.56–1.86 | 2.86      | **   | 1.04–7.82 | 5.57      | ***       | 1.89–16.37 | 5.32      | ***       | 1.79–15.81 | 4.30      | **        | 1.20–15.44 |           |
|                                   | Middle Atlantic    | 0.83 | 0.48–1.41 | 0.26      |      | 0.05–1.35 | 0.16      | *         | 0.02–1.38  | 0.15      | *         | 0.02–1.33  | 0.00      | ***       | 0.00–0.00  |           |
|                                   | Mountain           | 1.74 | **        | 1.07–2.84 | 1.96 | 0.72–5.33 | 3.98      | **        | 1.30–12.17 | 3.65      | **        | 1.13–11.77 | 3.98      | *         | 0.94–16.78 |           |
|                                   | New England        | 0.58 | *         | 0.31–1.08 | 0.20 | **        | 0.04–0.91 | 0.24      | *          | 0.05–1.23 | 0.24      | *          | 0.05–1.29 | 0.31      |            | 0.04–2.28 |
|                                   | South Atlantic     | 1.05 |           | 0.63–1.77 | 1.07 | 0.42–2.72 | 1.47      | 0.51–4.19 | 1.47       |           | 0.51–4.25 | 1.53       |           | 0.42–5.63 |            |           |
|                                   | West North Central | 1.31 |           | 0.75–2.28 | 1.27 | 0.41–3.88 | 2.62      | 0.80–8.55 | 2.23       |           | 0.65–7.72 | 1.35       |           | 0.27–6.75 |            |           |
|                                   | West South Central | 1.00 |           | 0.59–1.69 | 2.30 | 0.81–6.54 | 5.02      | ***       | 1.60–15.75 | 5.28      | ***       | 1.64–17.06 | 5.64      | **        | 1.32–24.03 |           |

Δ Odds ratio and significance level of *p*-value: "\*\*\*\*" < 0.01; 0.01 < "\*\*\*" < 0.05; 0.05 < "\*\*" < 0.1; § Smokeless tobacco use and e-cigarette use were using the same measure in each model; † Data for state level cigarette tax ranking are in Jan 2015 and tobacco control spending per capita are in 2015.

**Supplementary Table S4b. Logistic Regression Equations, Female Former Smokers Who Quit More Than Three Years, Ever, Current (at Least Once in the Last 30 Days), 5 or More, 10 or More, 20 or More of the Last 30 Days Measures of E-cigarette Use, TUS-CPS, 2014/5**

| Variable                            | Category                 | Ever use |       |           | Current use |      |           | >5 days |      |           | >10 days |      |           | >20 days |      |           |
|-------------------------------------|--------------------------|----------|-------|-----------|-------------|------|-----------|---------|------|-----------|----------|------|-----------|----------|------|-----------|
|                                     |                          | OR       | ProbΔ | 95% CI    | OR          | Prob | 95% CI    | OR      | Prob | 95% CI    | OR       | Prob | 95% CI    | OR       | Prob | 95% CI    |
| Intercept                           |                          | 0.02     | ***   | 0.01–0.06 | 0.00        | ***  | 0.00–0.02 | 0.00    | ***  | 0.00–0.02 | 0.00     | ***  | 0.00–0.02 | 0.00     | ***  | 0.00–0.04 |
| Age (ref: 35–44)                    | 18–24                    | 2.97     | **    | 1.21–7.29 | 0.00        | ***  | 0.00–0.00 | 0.00    | ***  | 0.00–0.00 | 0.00     | ***  | 0.00–0.00 | 0.00     | ***  | 0.00–0.00 |
|                                     | 22–25                    | 1.80     | ***   | 1.24–2.60 | 1.54        |      | 0.66–3.61 | 1.27    |      | 0.48–3.37 | 1.46     |      | 0.53–4.07 | 2.12     |      | 0.65–6.88 |
|                                     | 45–64                    | 0.47     | ***   | 0.34–0.66 | 0.51        |      | 0.23–1.16 | 0.40    | **   | 0.17–0.96 | 0.42     | *    | 0.16–1.11 | 0.60     |      | 0.18–1.93 |
|                                     | 65+                      | 0.12     | ***   | 0.08–0.20 | 0.18        | ***  | 0.06–0.57 | 0.16    | ***  | 0.05–0.52 | 0.18     | ***  | 0.05–0.63 | 0.24     | *    | 0.05–1.09 |
| Race (ref: White)                   | Asian                    | 1.89     |       | 0.69–5.20 | 0.00        | ***  | 0.00–0.00 | 0.00    | ***  | 0.00–0.00 | 0.00     | ***  | 0.00–0.00 | 0.00     | ***  | 0.00–0.00 |
|                                     | Black                    | 0.69     |       | 0.36–1.31 | 0.80        |      | 0.19–3.31 | 1.00    |      | 0.23–4.30 | 1.01     |      | 0.24–4.30 | 0.61     |      | 0.09–3.91 |
|                                     | Other races              | 1.47     |       | 0.76–2.85 | 1.24        |      | 0.21–7.45 | 0.00    | ***  | 0.00–0.00 | 0.00     | ***  | 0.00–0.00 | 0.00     | ***  | 0.00–0.00 |
| Hispanic (ref: Non-Hispanic)        | Hispanic                 | 1.46     |       | 0.93–2.30 | 0.73        |      | 0.19–2.80 | 0.46    |      | 0.08–2.68 | 0.50     |      | 0.08–2.95 | 0.52     |      | 0.08–3.31 |
| Education (ref: Less than 12 years) | High school degree       | 1.38     |       | 0.75–2.54 | 1.55        |      | 0.39–6.10 | 1.55    |      | 0.38–6.26 | 1.53     |      | 0.37–6.26 | 1.21     |      | 0.27–5.37 |
|                                     | Associate degree         | 1.87     | **    | 1.02–3.43 | 1.22        |      | 0.33–4.52 | 0.88    |      | 0.23–3.39 | 0.91     |      | 0.23–3.55 | 0.81     |      | 0.20–3.24 |
|                                     | College degree or higher | 1.34     |       | 0.70–2.57 | 0.73        |      | 0.18–3.01 | 0.61    |      | 0.14–2.74 | 0.51     |      | 0.10–2.49 | 0.35     |      | 0.07–1.79 |
| Family income (ref: \$0–\$19,999)   | \$20,000–\$39,999        | 0.67     | *     | 0.44–1.03 | 1.58        |      | 0.54–4.57 | 1.24    |      | 0.39–3.96 | 1.16     |      | 0.34–3.93 | 1.06     |      | 0.28–4.09 |
|                                     | \$40,000–\$74,999        | 0.66     | *     | 0.43–1.02 | 1.12        |      | 0.37–3.37 | 0.89    |      | 0.27–2.97 | 0.95     |      | 0.28–3.22 | 1.04     |      | 0.30–3.58 |
|                                     | \$75,000 or more         | 0.84     |       | 0.54–1.31 | 0.86        |      | 0.25–3.03 | 0.70    |      | 0.17–2.82 | 0.73     |      | 0.17–3.13 | 0.76     |      | 0.19–2.94 |

|                                                               |                                                     |      |     |           |      |               |      |               |      |               |      |               |
|---------------------------------------------------------------|-----------------------------------------------------|------|-----|-----------|------|---------------|------|---------------|------|---------------|------|---------------|
| Marital status (ref: Married-Spouse Present)                  | Never Married                                       | 1.54 | **  | 1.06–2.25 | 1.48 | 0.62–3.57     | 1.17 | 0.41–3.37     | 1.33 | 0.46–3.88     | 1.80 | 0.66–4.96     |
|                                                               | Married-Spouse Absent or Widowed/Divorced/Separated | 1.34 | *   | 0.97–1.85 | 1.53 | 0.71–3.32     | 1.31 | 0.57–3.02     | 1.36 | 0.56–3.33     | 1.21 | 0.48–3.08     |
| Employment status (ref: Employed)                             | Not in labor force or unemployed                    | 1.17 |     | 0.77–1.76 | 1.36 | 0.42–4.37     | 2.97 | 0.38–23.14    | 2.87 | 0.37–22.11    | 2.62 | 0.34–20.38    |
| Metropolitan status (ref: Non-MSA)                            | MSA                                                 | 1.37 | *   | 0.96–1.95 | 1.27 | 0.62–2.60     | 1.16 | 0.53–2.53     | 1.14 | 0.50–2.59     | 1.00 | 0.41–2.45     |
| Indoor workers (ref: No)                                      | Yes                                                 | 0.83 |     | 0.57–1.21 | 1.19 | 0.38–3.70     | 2.76 | 0.37–20.57    | 2.36 | 0.32–17.46    | 1.81 | 0.24–13.43    |
| Smokeless tobacco use § (ref: No)                             | Yes                                                 | 3.91 | *** | 2.53–6.05 | 0.00 | *** 0.00–0.00 | 0.00 | *** 0.00–0.00 | 0.00 | *** 0.00–0.00 | 0.00 | *** 0.00–0.00 |
| State level cigarette tax ranking † (ref: Lowest quarter)     | Med-low quarter                                     | 0.83 |     | 0.50–1.37 | 0.51 | 0.14–1.85     | 0.46 | 0.12–1.80     | 0.46 | 0.11–1.98     | 0.38 | 0.07–1.92     |
|                                                               | Med-high quarter                                    | 0.99 |     | 0.61–1.60 | 0.76 | 0.22–2.70     | 0.72 | 0.19–2.79     | 0.72 | 0.17–3.04     | 0.82 | 0.18–3.82     |
|                                                               | Highest quarter                                     | 1.02 |     | 0.57–1.82 | 1.00 | 0.23–4.31     | 0.85 | 0.19–3.84     | 0.78 | 0.16–3.85     | 0.49 | 0.09–2.80     |
| Tobacco control spending per capita † (ref: Lowest quarter)   | Med-low quarter                                     | 1.26 |     | 0.86–1.85 | 1.65 | 0.74–3.68     | 1.46 | 0.59–3.60     | 1.31 | 0.52–3.29     | 1.20 | 0.43–3.34     |
|                                                               | Med-high quarter                                    | 1.19 |     | 0.78–1.82 | 1.45 | 0.49–4.29     | 1.90 | 0.55–6.53     | 1.51 | 0.41–5.59     | 1.16 | 0.24–5.56     |
|                                                               | Highest quarter                                     | 1.06 |     | 0.65–1.73 | 1.09 | 0.32–3.71     | 1.37 | 0.33–5.61     | 1.09 | 0.22–5.32     | 1.07 | 0.19–6.09     |
| State level worksite smoking ban (ref: Not highest level)     | Highest level                                       | 0.90 |     | 0.60–1.36 | 1.35 | 0.48–3.85     | 1.65 | 0.53–5.07     | 1.86 | 0.57–6.08     | 2.56 | 0.79–8.29     |
| State level worksite e-cigarette ban (ref: Not highest level) | Highest level                                       | 1.97 | **  | 1.08–3.60 | 0.91 | 0.17–4.84     | 0.64 | 0.07–5.54     | 0.67 | 0.07–6.24     | 0.94 | 0.10–8.68     |
| State level e-cigarette tax (ref: No)                         | Yes                                                 | 0.71 |     | 0.25–2.00 | 0.98 | 0.12–7.99     | 0.95 | 0.06–14.54    | 2.91 | 0.14–61.49    | 5.28 | 0.22–128.04   |
| Survey time (ref: July 2014)                                  | Jan 2015                                            | 1.17 |     | 0.86–1.60 | 1.03 | 0.52–2.06     | 1.36 | 0.63–2.91     | 1.47 | 0.64–3.39     | 1.20 | 0.49–2.96     |
|                                                               | May 2015                                            | 1.31 | *   | 0.96–1.78 | 1.18 | 0.58–2.43     | 1.37 | 0.60–3.13     | 1.58 | 0.66–3.82     | 1.40 | 0.55–3.57     |
| Census division (ref: Pacific)                                | East North Central                                  | 1.56 |     | 0.86–2.83 | 1.36 | 0.26–7.19     | 1.32 | 0.21–8.19     | 1.39 | 0.21–9.31     | 0.84 | 0.12–5.74     |
|                                                               | East South Central                                  | 1.80 | *   | 0.91–3.54 | 1.78 | 0.30–10.60    | 1.57 | 0.26–9.45     | 1.69 | 0.26–11.08    | 0.46 | 0.04–5.96     |
|                                                               | Middle Atlantic                                     | 0.85 |     | 0.44–1.61 | 0.34 | 0.04–2.72     | 0.29 | 0.03–2.33     | 0.33 | 0.04–3.02     | 0.12 | 0.01–1.95     |
|                                                               | Mountain                                            | 1.46 |     | 0.80–2.66 | 2.54 | 0.52–12.45    | 1.55 | 0.27–8.82     | 1.65 | 0.27–10.22    | 1.08 | 0.18–6.43     |
|                                                               | New England                                         | 0.77 |     | 0.39–1.55 | 1.13 | 0.20–6.37     | 0.95 | 0.13–6.96     | 0.78 | 0.09–7.01     | 0.37 | 0.03–4.71     |
|                                                               | South Atlantic                                      | 1.06 |     | 0.62–1.82 | 1.80 | 0.43–7.60     | 0.95 | 0.22–4.15     | 1.06 | 0.23–4.96     | 0.97 | 0.22–4.37     |
|                                                               | West North Central                                  | 1.45 |     | 0.74–2.84 | 0.83 | 0.13–5.24     | 0.34 | 0.04–2.77     | 0.14 | 0.01–1.89     | 0.09 | * 0.01–1.22   |
|                                                               | West South Central                                  | 1.63 |     | 0.90–2.96 | 2.07 | 0.38–11.33    | 1.97 | 0.33–11.85    | 1.93 | 0.28–13.25    | 1.38 | 0.20–9.79     |

Δ Odds ratio and significance level of *p*-value: "\*\*\*\*" < 0.01; 0.01 < "\*\*\*" < 0.05; 0.05 < "\*" <= 0.1; § Smokeless tobacco use and e-cigarette use were using the same measure in each model; † Data for state level cigarette tax ranking are in Jan 2015 and tobacco control spending per capita are in 2015.

**Supplementary Table S5a. Logistic Regression Equations, Male Never Smokers 12 Months Ago, Ever, Current (at Least Once in the Last 30 Days), 5 or More, 10 or More, 20 or More of the Last 30 Days Measures of E-cigarette Use, TUS-CPS, 2014/5**

| Variable                                                  | Category                                            | Ever use |       |             | Current use |      |             | >5 days |      |             | >10 days |      |             | >20 days |      |             |
|-----------------------------------------------------------|-----------------------------------------------------|----------|-------|-------------|-------------|------|-------------|---------|------|-------------|----------|------|-------------|----------|------|-------------|
|                                                           |                                                     | OR       | ProbΔ | 95% CI      | OR          | Prob | 95% CI      | OR      | Prob | 95% CI      | OR       | Prob | 95% CI      | OR       | Prob | 95% CI      |
| Intercept                                                 |                                                     | 0.01     | ***   | 0.00–0.01   | 0.00        | ***  | 0.00–0.01   | 0.00    | ***  | 0.00–0.00   | 0.00     | ***  | 0.00–0.00   | 0.00     | ***  | 0.00–0.00   |
| Age (ref: 35–44)                                          | 18–24                                               | 3.99     | ***   | 3.03–5.27   | 3.97        | ***  | 2.01–7.81   | 3.42    | ***  | 1.47–7.93   | 2.37     | *    | 0.98–5.75   | 2.10     |      | 0.68–6.49   |
|                                                           | 22–25                                               | 2.22     | ***   | 1.74–2.83   | 2.27        | ***  | 1.28–4.03   | 2.24    | **   | 1.15–4.38   | 2.14     | **   | 1.02–4.46   | 1.88     |      | 0.77–4.58   |
|                                                           | 45–64                                               | 0.42     | ***   | 0.32–0.56   | 0.43        | ***  | 0.23–0.80   | 0.40    | **   | 0.19–0.82   | 0.38     | **   | 0.17–0.86   | 0.14     | ***  | 0.04–0.44   |
|                                                           | 65+                                                 | 0.22     | ***   | 0.14–0.36   | 0.35        | **   | 0.13–0.95   | 0.45    |      | 0.14–1.44   | 0.16     | **   | 0.03–0.80   | 0.17     | **   | 0.03–0.90   |
| Race (ref: White)                                         | Asian                                               | 0.62     | **    | 0.40–0.95   | 0.46        |      | 0.16–1.27   | 0.00    | ***  | 0.00–0.00   | 0.00     | ***  | 0.00–0.00   | 0.00     | ***  | 0.00–0.00   |
|                                                           | Black                                               | 0.49     | ***   | 0.35–0.69   | 0.36        | ***  | 0.18–0.72   | 0.33    | ***  | 0.14–0.76   | 0.34     | **   | 0.13–0.91   | 0.24     | **   | 0.06–0.86   |
|                                                           | Other races                                         | 1.49     | **    | 1.03–2.17   | 1.16        |      | 0.40–3.37   | 1.16    |      | 0.32–4.26   | 0.06     | ***  | 0.01–0.33   | 0.07     | ***  | 0.01–0.52   |
| Hispanic (ref: Non-Hispanic)                              | Hispanic                                            | 0.75     | **    | 0.58–0.98   | 0.61        | *    | 0.34–1.10   | 0.41    | **   | 0.19–0.89   | 0.38     | **   | 0.15–0.95   | 0.41     |      | 0.14–1.20   |
| Education (ref: Less than 12 years)                       | High school degree                                  | 1.37     |       | 0.92–2.05   | 2.23        | *    | 0.99–5.03   | 2.83    | *    | 0.99–8.11   | 1.85     |      | 0.62–5.54   | 2.44     |      | 0.62–9.61   |
|                                                           | Associate degree                                    | 1.66     | **    | 1.11–2.48   | 2.16        | *    | 0.97–4.81   | 2.65    | *    | 0.92–7.61   | 1.92     |      | 0.64–5.76   | 1.96     |      | 0.48–8.01   |
|                                                           | College degree or higher                            | 1.18     |       | 0.77–1.80   | 0.96        |      | 0.40–2.32   | 1.16    |      | 0.37–3.66   | 0.82     |      | 0.24–2.78   | 1.29     |      | 0.28–6.03   |
| Family income (ref: \$0–\$19,999)                         | \$20,000–\$39,999                                   | 1.03     |       | 0.78–1.36   | 0.74        |      | 0.39–1.39   | 0.79    |      | 0.34–1.82   | 1.23     |      | 0.48–3.19   | 1.26     |      | 0.41–3.84   |
|                                                           | \$40,000–\$74,999                                   | 0.85     |       | 0.64–1.11   | 0.68        |      | 0.38–1.21   | 0.84    |      | 0.39–1.80   | 1.04     |      | 0.42–2.62   | 0.95     |      | 0.34–2.65   |
|                                                           | \$75,000 or more                                    | 0.90     |       | 0.68–1.20   | 1.05        |      | 0.58–1.90   | 1.38    |      | 0.64–2.98   | 1.90     |      | 0.76–4.75   | 1.78     |      | 0.65–4.90   |
| Marital status (ref: Married-Spouse Present)              | Never Married                                       | 2.39     | ***   | 1.92–2.98   | 1.58        | *    | 0.95–2.62   | 1.51    |      | 0.80–2.87   | 1.68     | *    | 0.93–3.03   | 2.07     | *    | 0.97–4.40   |
|                                                           | Married-Spouse Absent or Widowed/Divorced/Separated | 1.57     | ***   | 1.16–2.13   | 1.71        | *    | 0.95–3.10   | 1.41    |      | 0.73–2.73   | 1.24     |      | 0.56–2.73   | 1.82     |      | 0.68–4.89   |
| Employment status (ref: Employed)                         | Not in labor force or unemployed                    | 0.88     |       | 0.68–1.16   | 0.76        |      | 0.42–1.39   | 0.55    |      | 0.26–1.14   | 0.77     |      | 0.36–1.66   | 0.96     |      | 0.37–2.48   |
| Metropolitan status (ref: Non-MSA)                        | MSA                                                 | 1.31     | **    | 1.03–1.67   | 1.21        |      | 0.70–2.09   | 1.27    |      | 0.69–2.33   | 1.17     |      | 0.61–2.26   | 1.55     |      | 0.58–4.14   |
| Indoor workers (ref: No)                                  | Yes                                                 | 1.02     |       | 0.83–1.25   | 1.00        |      | 0.65–1.53   | 0.87    |      | 0.54–1.40   | 0.90     |      | 0.53–1.52   | 0.82     |      | 0.40–1.65   |
| Current smoking status (ref: Never smokers one year ago)  | Current Smokers                                     | 22.51    | ***   | 16.64–30.45 | 26.98       | ***  | 17.53–41.52 | 31.82   | ***  | 19.52–51.87 | 36.65    | ***  | 21.74–61.76 | 35.74    | ***  | 18.42–69.36 |
| Smokeless tobacco use § (ref: No)                         | Yes                                                 | 6.74     | ***   | 5.54–8.21   | 1.80        |      | 0.88–3.70   | 1.88    |      | 0.84–4.20   | 2.32     | *    | 0.97–5.57   | 0.77     |      | 0.09–6.78   |
| State level cigarette tax ranking † (ref: Lowest quarter) | Med-low quarter                                     | 1.38     | **    | 1.02–1.88   | 1.57        |      | 0.81–3.02   | 2.89    | ***  | 1.33–6.29   | 1.96     |      | 0.87–4.45   | 1.81     |      | 0.69–4.73   |
|                                                           | Med-high quarter                                    | 1.32     | *     | 0.96–1.79   | 1.35        |      | 0.68–2.66   | 2.27    | *    | 0.99–5.22   | 1.49     |      | 0.62–3.58   | 1.22     |      | 0.42–3.57   |
|                                                           | Highest quarter                                     | 2.04     | ***   | 1.40–2.98   | 1.02        |      | 0.44–2.37   | 2.21    | *    | 0.89–5.49   | 2.15     |      | 0.80–5.80   | 1.19     |      | 0.38–3.72   |
|                                                           | Med-low quarter                                     | 1.31     | *     | 1.00–1.71   | 1.45        |      | 0.83–2.55   | 1.93    | **   | 1.06–3.50   | 1.93     | *    | 0.98–3.82   | 1.70     |      | 0.78–3.70   |

|                                                               |                    |      |     |           |      |             |      |           |      |              |      |              |
|---------------------------------------------------------------|--------------------|------|-----|-----------|------|-------------|------|-----------|------|--------------|------|--------------|
| Tobacco control spending per capita † (ref: Lowest quarter)   | Med-high quarter   | 1.00 |     | 0.77–1.30 | 0.79 | 0.45–1.37   | 1.03 | 0.54–1.97 | 1.40 | 0.66–2.94    | 1.18 | 0.43–3.23    |
|                                                               | Highest quarter    | 0.77 | *   | 0.57–1.04 | 0.57 | * 0.30–1.10 | 0.69 | 0.31–1.51 | 0.92 | 0.37–2.25    | 0.83 | 0.25–2.78    |
| State level worksite smoking ban (ref: Not highest level)     | Highest level      | 0.77 | **  | 0.60–0.99 | 0.94 | 0.56–1.58   | 0.62 | 0.33–1.17 | 0.70 | 0.36–1.38    | 1.04 | 0.50–2.17    |
| State level worksite e-cigarette ban (ref: Not highest level) | Highest level      | 0.67 | *   | 0.42–1.06 | 1.77 | 0.66–4.77   | 1.74 | 0.56–5.37 | 1.89 | 0.50–7.14    | 3.41 | * 0.80–14.45 |
| State level e-cigarette tax (ref: No)                         | Yes                | 0.50 | *   | 0.23–1.09 | 0.73 | 0.12–4.40   | 0.37 | 0.03–4.03 | 0.21 | 0.02–2.44    | 0.73 | 0.05–10.64   |
| Survey time (ref: July 2014)                                  | Jan 2015           | 1.04 |     | 0.85–1.27 | 0.97 | 0.62–1.51   | 0.83 | 0.48–1.44 | 0.76 | 0.41–1.42    | 0.64 | 0.30–1.39    |
|                                                               | May 2015           | 1.03 |     | 0.84–1.26 | 0.72 | 0.47–1.11   | 0.87 | 0.52–1.43 | 1.02 | 0.58–1.80    | 0.89 | 0.44–1.81    |
| Census division (ref: Pacific)                                | East North Central | 0.69 | *   | 0.47–1.00 | 0.74 | 0.31–1.74   | 1.14 | 0.40–3.23 | 1.03 | 0.34–3.06    | 1.14 | 0.29–4.45    |
|                                                               | East South Central | 0.53 | *** | 0.34–0.82 | 0.65 | 0.27–1.58   | 1.37 | 0.53–3.53 | 1.12 | 0.39–3.23    | 1.61 | 0.45–5.68    |
|                                                               | Middle Atlantic    | 0.76 |     | 0.51–1.14 | 0.45 | 0.17–1.22   | 0.41 | 0.10–1.72 | 0.18 | ** 0.04–0.86 | 0.26 | 0.04–1.54    |
|                                                               | Mountain           | 1.36 | *   | 0.95–1.94 | 0.79 | 0.35–1.78   | 1.69 | 0.61–4.70 | 1.63 | 0.52–5.11    | 0.95 | 0.23–4.01    |
|                                                               | New England        | 0.38 | *** | 0.23–0.64 | 0.46 | 0.14–1.49   | 0.65 | 0.16–2.69 | 0.64 | 0.14–2.96    | 1.30 | 0.23–7.29    |
|                                                               | South Atlantic     | 0.75 | *   | 0.54–1.04 | 0.78 | 0.39–1.57   | 1.48 | 0.62–3.54 | 1.22 | 0.47–3.17    | 1.42 | 0.45–4.51    |
|                                                               | West North Central | 0.83 |     | 0.56–1.23 | 0.48 | 0.19–1.24   | 0.83 | 0.25–2.82 | 1.05 | 0.30–3.62    | 0.88 | 0.18–4.44    |
|                                                               | West South Central | 0.83 |     | 0.57–1.21 | 1.05 | 0.48–2.27   | 1.24 | 0.48–3.22 | 1.22 | 0.43–3.41    | 0.98 | 0.23–4.08    |

Δ Odds ratio and significance level of *p*-value: "\*\*\*\*" < 0.01; 0.01 < "\*\*\*" < 0.05; 0.05 < "\*" <= 0.1; § Smokeless tobacco use and e-cigarette use were using the same measure in each model; † Data for state level cigarette tax ranking are in Jan 2015 and tobacco control spending per capita are in 2015.

**Supplementary Table S5b. Logistic Regression Equations, Female Never Smokers 12 Months Ago, Ever, Current (at Least Once in the Last 30 Days), 5 or More, 10 or More, 20 or More of the Last 30 Days Measures of E-cigarette Use, TUS-CPS, 2014/5**

| Variable                                                 | Category                                            | Ever use |       |             | Current use |      |             | >5 days |      |              | >10 days |      |              | >20 days |      |             |
|----------------------------------------------------------|-----------------------------------------------------|----------|-------|-------------|-------------|------|-------------|---------|------|--------------|----------|------|--------------|----------|------|-------------|
|                                                          |                                                     | OR       | ProbΔ | 95% CI      | OR          | Prob | 95% CI      | OR      | Prob | 95% CI       | OR       | Prob | 95% CI       | OR       | Prob | 95% CI      |
| Intercept                                                |                                                     | 0.01     | ***   | 0.00–0.02   | 0.00        | ***  | 0.00–0.01   | 0.00    | ***  | 0.00–0.01    | 0.00     | ***  | 0.00–0.01    | 0.00     | ***  | 0.00–0.00   |
| Age (ref: 35–44)                                         | 18–24                                               | 3.06     | ***   | 2.27–4.12   | 1.91        | *    | 0.96–3.80   | 1.65    |      | 0.73–3.73    | 2.26     |      | 0.85–6.03    | 2.10     |      | 0.62–7.12   |
|                                                          | 22–25                                               | 1.96     | ***   | 1.50–2.55   | 1.57        |      | 0.84–2.91   | 0.99    |      | 0.48–2.06    | 1.37     |      | 0.58–3.21    | 1.91     |      | 0.68–5.37   |
|                                                          | 45–64                                               | 0.46     | ***   | 0.35–0.61   | 0.41        | ***  | 0.21–0.80   | 0.30    | ***  | 0.14–0.63    | 0.29     | ***  | 0.12–0.73    | 0.35     | *    | 0.12–1.02   |
|                                                          | 65+                                                 | 0.13     | ***   | 0.07–0.23   | 0.13        | ***  | 0.04–0.38   | 0.10    | ***  | 0.03–0.31    | 0.14     | ***  | 0.04–0.50    | 0.16     | **   | 0.03–0.76   |
| Race (ref: White)                                        | Asian                                               | 0.44     | ***   | 0.23–0.81   | 0.04        | ***  | 0.01–0.16   | 0.03    | ***  | 0.00–0.23    | 0.00     | ***  | 0.00–0.00    | 0.00     | ***  | 0.00–0.00   |
|                                                          | Black                                               | 0.38     | ***   | 0.27–0.54   | 0.24        | ***  | 0.11–0.51   | 0.28    | ***  | 0.12–0.67    | 0.28     | **   | 0.10–0.74    | 0.26     | **   | 0.08–0.89   |
|                                                          | Other races                                         | 1.35     |       | 0.87–2.08   | 1.20        |      | 0.49–2.92   | 0.44    | *    | 0.17–1.11    | 0.27     | *    | 0.07–1.08    | 0.12     | **   | 0.02–0.90   |
| Hispanic (ref: Non-Hispanic)                             | Hispanic                                            | 0.54     | ***   | 0.40–0.73   | 0.40        | ***  | 0.20–0.79   | 0.25    | ***  | 0.10–0.59    | 0.31     | **   | 0.12–0.81    | 0.24     | **   | 0.07–0.86   |
| Education (ref: Less than 12 years)                      | High school degree                                  | 1.17     |       | 0.74–1.84   | 1.70        |      | 0.81–3.60   | 1.73    |      | 0.75–3.97    | 1.84     |      | 0.75–4.48    | 2.41     |      | 0.78–7.44   |
|                                                          | Associate degree                                    | 1.70     | **    | 1.10–2.63   | 1.54        |      | 0.73–3.23   | 1.31    |      | 0.56–3.06    | 1.34     |      | 0.53–3.36    | 1.44     |      | 0.45–4.65   |
|                                                          | College degree or higher                            | 0.89     |       | 0.56–1.42   | 0.67        |      | 0.27–1.64   | 0.60    |      | 0.21–1.77    | 0.62     |      | 0.18–2.08    | 0.06     | ***  | 0.01–0.36   |
| Family income (ref: \$0–\$19,999)                        | \$20,000–\$39,999                                   | 0.80     |       | 0.60–1.06   | 0.83        |      | 0.46–1.51   | 0.76    |      | 0.38–1.53    | 0.52     |      | 0.23–1.17    | 1.07     |      | 0.41–2.83   |
|                                                          | \$40,000–\$74,999                                   | 0.75     | *     | 0.56–1.01   | 0.61        |      | 0.32–1.14   | 0.61    |      | 0.29–1.29    | 0.42     | *    | 0.17–1.00    | 1.13     |      | 0.42–3.02   |
|                                                          | \$75,000 or more                                    | 0.84     |       | 0.61–1.16   | 0.80        |      | 0.40–1.61   | 0.78    |      | 0.35–1.73    | 0.58     |      | 0.23–1.46    | 1.04     |      | 0.37–2.96   |
| Marital status (ref: Married-Spouse Present)             | Never Married                                       | 1.69     | ***   | 1.33–2.14   | 2.30        | ***  | 1.30–4.08   | 2.04    | **   | 1.05–3.96    | 1.32     |      | 0.61–2.88    | 1.75     |      | 0.56–5.47   |
|                                                          | Married-Spouse Absent or Widowed/Divorced/Separated | 1.37     | **    | 1.04–1.80   | 2.18        | ***  | 1.22–3.91   | 2.53    | ***  | 1.29–4.98    | 2.62     | **   | 1.25–5.47    | 4.34     | ***  | 1.69–11.11  |
| Employment status (ref: Employed)                        | Not in labor force or unemployed                    | 0.98     |       | 0.70–1.37   | 0.57        | *    | 0.31–1.06   | 0.40    | ***  | 0.20–0.80    | 0.28     | ***  | 0.13–0.60    | 0.26     | ***  | 0.10–0.66   |
| Metropolitan status (ref: Non-MSA)                       | MSA                                                 | 1.16     |       | 0.89–1.52   | 0.85        |      | 0.49–1.50   | 0.86    |      | 0.45–1.67    | 0.96     |      | 0.43–2.13    | 2.29     |      | 0.83–6.35   |
| Indoor workers (ref: No)                                 | Yes                                                 | 1.25     |       | 0.92–1.71   | 0.70        |      | 0.38–1.28   | 0.50    | **   | 0.25–0.97    | 0.42     | **   | 0.20–0.88    | 0.34     | **   | 0.14–0.81   |
| Current smoking status (ref: Never smokers one year ago) | Current Smokers                                     | 39.31    | ***   | 30.07–51.39 | 48.29       | ***  | 30.91–75.44 | 60.50   | ***  | 35.95–101.82 | 61.66    | ***  | 32.72–116.20 | 44.82    | ***  | 20.22–99.34 |

|                                                               |                    |           |     |            |      |     |           |      |     |           |      |     |            |      |     |            |
|---------------------------------------------------------------|--------------------|-----------|-----|------------|------|-----|-----------|------|-----|-----------|------|-----|------------|------|-----|------------|
| Smokeless tobacco use § (ref: No)                             | Yes                | 14.9<br>2 | *** | 9.59–23.21 | 0.00 | *** | 0.00–0.00 | 0.00 | *** | 0.00–0.00 | 0.00 | *** | 0.00–0.00  | 0.00 | *** | 0.00–0.00  |
| State level cigarette tax ranking† (ref: Lowest quarter)      | Med-low quarter    | 0.87      |     | 0.61–1.25  | 0.83 |     | 0.39–1.75 | 0.67 |     | 0.30–1.52 | 0.88 |     | 0.35–2.24  | 1.09 |     | 0.36–3.33  |
|                                                               | Med-high quarter   | 0.96      |     | 0.67–1.38  | 1.38 |     | 0.67–2.84 | 1.14 |     | 0.51–2.56 | 0.97 |     | 0.38–2.45  | 1.72 |     | 0.49–5.94  |
|                                                               | Highest quarter    | 1.40      |     | 0.90–2.17  | 1.40 |     | 0.59–3.35 | 1.06 |     | 0.39–2.89 | 1.18 |     | 0.36–3.88  | 1.53 |     | 0.38–6.21  |
| Tobacco control spending per capita† (ref: Lowest quarter)    | Med-low quarter    | 1.16      |     | 0.86–1.55  | 1.66 |     | 0.86–3.21 | 1.52 |     | 0.69–3.35 | 2.26 | *   | 0.88–5.79  | 6.53 | *** | 2.17–19.62 |
|                                                               | Med-high quarter   | 1.00      |     | 0.74–1.35  | 1.34 |     | 0.71–2.54 | 1.12 |     | 0.54–2.32 | 1.57 |     | 0.67–3.66  | 3.38 | **  | 1.09–10.50 |
|                                                               | Highest quarter    | 0.98      |     | 0.70–1.38  | 1.58 |     | 0.79–3.16 | 1.16 |     | 0.50–2.68 | 1.28 |     | 0.42–3.86  | 2.98 |     | 0.68–13.17 |
| State level worksite smoking ban (ref: Not highest level)     | Highest level      | 0.82      |     | 0.62–1.08  | 0.81 |     | 0.45–1.46 | 1.23 |     | 0.64–2.37 | 1.01 |     | 0.47–2.17  | 0.50 |     | 0.20–1.27  |
| State level worksite e-cigarette ban (ref: Not highest level) | Highest level      | 0.60      | *   | 0.34–1.06  | 0.60 |     | 0.20–1.76 | 0.55 |     | 0.15–2.03 | 0.48 |     | 0.10–2.18  | 0.34 |     | 0.04–3.15  |
| State level e-cigarette tax (ref: No)                         | Yes                | 0.56      |     | 0.23–1.33  | 0.75 |     | 0.14–4.06 | 1.12 |     | 0.18–6.87 | 1.27 |     | 0.17–9.71  | 2.53 |     | 0.22–29.53 |
| Survey time (ref: July 2014)                                  | Jan 2015           | 1.16      |     | 0.93–1.46  | 0.79 |     | 0.48–1.31 | 0.67 |     | 0.37–1.22 | 0.95 |     | 0.47–1.93  | 0.50 |     | 0.22–1.17  |
|                                                               | May 2015           | 1.03      |     | 0.81–1.30  | 1.19 |     | 0.74–1.93 | 1.30 |     | 0.75–2.27 | 1.90 | *   | 0.97–3.71  | 1.54 |     | 0.66–3.58  |
| Census division (ref: Pacific)                                | East North Central | 0.82      |     | 0.53–1.28  | 0.97 |     | 0.33–2.86 | 0.65 |     | 0.18–2.35 | 0.94 |     | 0.22–4.04  | 0.67 |     | 0.11–4.09  |
|                                                               | East South Central | 0.65      | *   | 0.41–1.03  | 1.23 |     | 0.43–3.52 | 0.87 |     | 0.25–2.95 | 1.54 |     | 0.43–5.47  | 1.31 |     | 0.24–7.18  |
|                                                               | Middle Atlantic    | 0.63      | *   | 0.38–1.04  | 0.91 |     | 0.31–2.70 | 0.53 |     | 0.15–1.89 | 1.20 |     | 0.30–4.81  | 0.43 |     | 0.06–3.04  |
|                                                               | Mountain           | 1.25      |     | 0.82–1.91  | 2.14 |     | 0.75–6.07 | 1.68 |     | 0.54–5.22 | 2.60 |     | 0.60–11.21 | 3.74 |     | 0.68–20.59 |
|                                                               | New England        | 0.64      |     | 0.37–1.10  | 1.06 |     | 0.33–3.37 | 0.78 |     | 0.19–3.24 | 1.08 |     | 0.19–6.21  | 0.64 |     | 0.05–7.91  |
|                                                               | South Atlantic     | 0.62      | **  | 0.42–0.92  | 2.08 | *   | 0.90–4.78 | 1.12 |     | 0.45–2.83 | 1.48 |     | 0.51–4.31  | 1.42 |     | 0.37–5.52  |
|                                                               | West North Central | 0.85      |     | 0.53–1.36  | 1.86 |     | 0.68–5.11 | 1.30 |     | 0.42–4.04 | 1.93 |     | 0.52–7.21  | 1.55 |     | 0.24–10.01 |
|                                                               | West South Central | 0.96      |     | 0.63–1.47  | 1.45 |     | 0.57–3.68 | 1.07 |     | 0.36–3.18 | 1.76 |     | 0.49–6.34  | 1.26 |     | 0.27–5.87  |

Δ Odds ratio and significance level of *p*-value: "\*\*\*\*" < 0.01; 0.01 < "\*\*\*" < 0.05; 0.05 < "\*\*" <= 0.1; § Smokeless tobacco use and e-cigarette use were using the same measure in each model; † Data for state level cigarette tax ranking are in Jan 2015 and tobacco control spending per capita are in 2015.
